# Supplementary material for: Effect of vitamin D supplementation on serum 25-hydroxyvitamin D concentration in children and adolescents: a systematic review and meta-analysis protocol
Source: PubMed Central journal article supplement — BMJ Open. 2018 Sep 19;8(9):e021636. doi: 10.1136/bmjopen-2018-021636 (PMC6150138; doi:10.1136/bmjopen-2018-021636), 2018-09-19
Supplement: bmjopen-2018-021636.draft_revisions.pdf [file bmjopen-2018-021636.draft_revisions.pdf]

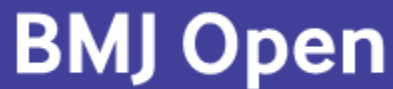

BMJ Open is committed to open peer review. As part of this commitment we make the peer review history of every article we publish publicly available.

When an article is published we post the peer reviewers' comments and the authors' responses online. We also post the versions of the paper that were used during peer review. These are the versions that the peer review comments apply to.

The versions of the paper that follow are the versions that were submitted during the peer review process. They are not the versions of record or the final published versions. They should not be cited or distributed as the published version of this manuscript.

BMJ Open is an open access journal and the full, final, typeset and author-corrected version of record of the manuscript is available on our site with no access controls, subscription charges or pay-per-view fees (<http://bmjopen.bmj.com>).

If you have any questions on BMJ Open's open peer review process please email [info.bmjopen@bmj.com](mailto:info.bmjopen@bmj.com)

# BMJ Open

## Effect of vitamin D supplementation on serum 25-hydroxyvitamin D concentration in children and adolescents: A systematic review and meta-analysis protocol

|                               |                                                                                                                                                                                                                                                                                                                                                                                                                                                                                                                                                                                                                                                                                                                                                                                                                                                                                                                                 |
|-------------------------------|---------------------------------------------------------------------------------------------------------------------------------------------------------------------------------------------------------------------------------------------------------------------------------------------------------------------------------------------------------------------------------------------------------------------------------------------------------------------------------------------------------------------------------------------------------------------------------------------------------------------------------------------------------------------------------------------------------------------------------------------------------------------------------------------------------------------------------------------------------------------------------------------------------------------------------|
| Journal:                      | <i>BMJ Open</i>                                                                                                                                                                                                                                                                                                                                                                                                                                                                                                                                                                                                                                                                                                                                                                                                                                                                                                                 |
| Manuscript ID                 | bmjopen-2018-021636                                                                                                                                                                                                                                                                                                                                                                                                                                                                                                                                                                                                                                                                                                                                                                                                                                                                                                             |
| Article Type:                 | Protocol                                                                                                                                                                                                                                                                                                                                                                                                                                                                                                                                                                                                                                                                                                                                                                                                                                                                                                                        |
| Date Submitted by the Author: | 10-Jan-2018                                                                                                                                                                                                                                                                                                                                                                                                                                                                                                                                                                                                                                                                                                                                                                                                                                                                                                                     |
| Complete List of Authors:     | Asghari, Golaleh; National Nutrition and Food Technology Research Institute, Shahid Beheshti University of Medical Sciences, Tehran, Iran, Department of Clinical Nutrition and Dietetics, Faculty of Nutrition Sciences and Food Technology<br>Farhadnejad, Hossein; National Nutrition and Food Technology Research Institute, Shahid Beheshti University of Medical Sciences, Tehran, Iran<br>Hosseinpanah, Farhad; Obesity Research Center, Research Institute for Endocrine Sciences, Shahid Beheshti University of Medical Sciences, Tehran, Iran<br>Moslehi, Nazanin; Shahid Beheshti University of Medical Sciences, Tehran, Iran<br>Mirmiran, Parvin; Nutrition and Endocrine Research Center, Research Institute for Endocrine Sciences, Shahid Beheshti University of Medical Sciences, Tehran, Iran<br>Azizi, Fereidoun; Research Institute for Endocrine Sciences, Shahid Beheshti University of Medical Sciences, |
| Keywords:                     | Vitamin D, 25-hydroxyvitamin D, children, adolescents, meta-analysis                                                                                                                                                                                                                                                                                                                                                                                                                                                                                                                                                                                                                                                                                                                                                                                                                                                            |
|                               |                                                                                                                                                                                                                                                                                                                                                                                                                                                                                                                                                                                                                                                                                                                                                                                                                                                                                                                                 |

SCHOLARONE™  
Manuscripts

**Effect of vitamin D supplementation on serum 25-hydroxyvitamin D concentration in children and adolescents: A systematic review and meta-analysis protocol**

Golaleh Asghari<sup>1</sup>, Hossein Farhadnejad<sup>1</sup>, Farhad Hosseinpanah<sup>3</sup>, Nazanin Moslehi<sup>1</sup>, Parvin Mirmiran<sup>2</sup>, Fereidoun Azizi<sup>4</sup>

<sup>1</sup>Department of Clinical Nutrition and Dietetics, Faculty of Nutrition Sciences and Food Technology, National Nutrition and Food Technology Research Institute, Shahid Beheshti University of Medical Sciences, Tehran, Iran

<sup>2</sup>Nutrition and Endocrine Research Center, Research Institute for Endocrine Sciences, Shahid Beheshti University of Medical Sciences, Tehran, Iran

<sup>3</sup>Obesity Research Center, Research Institute for Endocrine Sciences, Shahid Beheshti University of Medical Sciences, Tehran, Iran

<sup>4</sup>Endocrine Research Center, Research Institute for Endocrine Sciences, Shahid Beheshti University of Medical Sciences, Tehran, Iran

**Correspondence to:**

Parvin Mirmiran  
Nutrition and Endocrine Research Center, Research Institute for Endocrine Science, Shahid Beheshti University of Medical Sciences, Tehran, Iran  
P.O. Box: 19395-4763  
Phone: +98 (21) 22432503  
Fax: +98 (21) 22402463  
E-mail: [mirmiran@endocrine.ac.ir](mailto:mirmiran@endocrine.ac.ir)  
Alternative E-mail: [parvin.mirmiran@gmail.com](mailto:parvin.mirmiran@gmail.com)

## Abstract

**Introduction:** The importance of vitamin D for bone health as well as its role as a hormone in non-skeletal functions has long been documented. However, review investigations on the effect of vitamin D supplementation on serum 25-hydroxyvitamin D levels in children and adolescents are scarce. The aim of current study was to assess the impact of various doses of vitamin D supplementation on serum 25-hydroxyvitamin D concentrations in children and adolescents, and to identify relevant determinants of variations in the effect of vitamin D supplementation.

**Methods:** PubMed, Scopus, ISI Web of Science, and Cochrane Central Register of Controlled Trials (CENTRAL) databases to the 27-Sep-2017 will systematically be searched for randomized controlled trials of vitamin D supplementation compared with placebo, no intervention control, or comparative arm investigations. One reviewer will assess articles for eligibility according to prespecified selection criteria, after which data extraction and quality appraisal will be conducted by 2 independent reviewers. The quality assessment will be assessed using Jadad scales. Meta-analyses will be conducted where appropriate. We will express continuous measures (i.e serum 25-hydroxyvitamin D concentration) as mean differences (MDs) with 95% CIs. Heterogeneity of the data will be investigated via visual inspection of the forest plots and using Chi<sup>2</sup> test on N-1 degrees of freedom, with a significance level of  $\alpha=0.1$ . We will also assess the individual study and subgroup characteristics and perform a sensitivity analysis. Publication bias will be assessed using funnel plot and statistical analysis of Eggers' test.

**Ethics and dissemination:** Ethics approval is not required because the work is carried out on published documents. The authors will publish findings from this review through peer-reviewed publication or conference presentations.

1  
2  
3  
4  
5  
6  
7  
8  
9  
10  
11  
12  
13  
14  
15  
16  
17  
18  
19  
20  
21  
22  
23  
24  
25  
26  
27  
28  
29  
30  
31  
32  
33  
34  
35  
36  
37  
38  
39  
40  
41  
42  
43  
44  
45  
46  
47  
48  
49  
50  
51  
52  
53  
54  
55  
56  
57  
58  
59  
60

**Trial registration number:** PROSPERO CRD42017067179.

**Keywords:** Vitamin D; 25-hydroxyvitamin D; children; adolescents; meta-analysis

For peer review only

## Strengths and limitations of this study

- This systematic review will comprehensively assess the effectiveness and safety of variable doses of vitamin D supplementation in children and adolescents for improving serum 25-hydroxyvitamin D concentrations.
- The study screening, data extraction and quality assessment will be fulfilled by two independent reviewers.
- Some variables including sex, 25-hydroxy vitamin D baseline level, length of intervention, frequency of intervention, doses of vitamin D supplementation may cause considerable heterogeneity in this review.
- Studies may not systematically report all outcomes.
- The systematic review will include only published data.

**Introduction**

The importance of vitamin D for bone health as well as its role as a hormone in non-skeletal functions has long been clarified. Currently, vitamin D deficiency is a global problem, and a recent systematic review found that about 37% of the studies reported an average of less than 20 ng/ml for 25-hydroxyvitamin D [1]. Since childhood and adolescence life cycles increase vitamin requirements for the growth of muscle and bone, vitamin D deficiency is also significantly observed during this period. Low vitamin D status has recently been reported in children and adolescents across countries of the Middle East such as Iran [2, 3], Saudi Arabia [4], Jordan [5], and United Arab Emirates [6], as well as in South East Asia [7, 8], Europe [9], and the United States [10]. Although many trials have evaluated the effects of vitamin D supplementation on clinical outcomes, few attempts have been made for evaluating the influence of variable doses of vitamin D supplementation on serum 25-hydroxyvitamin D levels in children and adolescents [11], a factor crucial for stipulating dietary recommendations. Based on recommendations of the Institute of Medicine (IOM) in 2011, the recommended dietary allowance (RDA) is 600 IU for 9-18-year old children and adolescents [12], whereas based on recommendations of the Endocrine Society, 9-18-year old children and adolescents need at least 600 IU of vitamin D daily, and at least 1000 IU of vitamin D is essential to maintain levels of 25-hydroxyvitamin D > 30 ng/ml [13]; this controversy may be explained by the fact that IOM recommendations are based on achieving the target level of  $\geq 20$  ng/ml for 25-hydroxyvitamin D, while the Endocrine society recommendation is based on achieving  $\geq 30$  ng/ml. The Society for Adolescent Health and Medicine suggests 600 IU vitamin D for healthy adolescents and at least 1000 IU for adolescents at risk of vitamin D deficiency such as obesity [14], emphasizing the differences in recommendations of these two scientific societies.

Serum level of 25-hydroxyvitamin D is a commonly used marker of the long-term vitamin D nutritional status of individuals. Exposure to sunlight is the most important factor in the synthesis of vitamin D, which is dependent on skin color, latitude, season, lifestyle, and dress codes based on the cultural beliefs of individuals. Supplementation of vitamin D and dietary intake of limited foods also increase 25-hydroxyvitamin D concentrations. Previous studies in adults showed that baseline 25-hydroxyvitamin D, concurrent calcium intakes, and the level of overweight and obesity are among other factors which may affect 25-hydroxyvitamin D in response to vitamin D supplementation [15]. Studies have shown a direct association of increase in body mass index (BMI) with decrease in both 25-hydroxyvitamin D and 1,25-hydroxyvitamin D and increase in parathyroid hormone [16-18]. A stronger correlation between the fat mass and concentration of 25-hydroxyvitamin D has also been reported due to reduction in calcium and vitamin D intake, bioavailability and subcutaneous synthesis of vitamin D, and activation of 25-hydroxyvitamin D, increase in vitamin D catabolism or 25-hydroxy vitamin D sequestration in fat tissue [19, 20]. A systematic review in adults found that the average increase in serum 25-hydroxyvitamin D concentrations was 0.78 ng/ml per mcg of vitamin D3 per day [21]. Recently a review study from the Middle East and North Africa (MENA) region showed that intakes of intermediate vitamin D dose of 1000–2000 IU daily may be necessary to facilitate for achievement of optimal 25-hydroxyvitamin D level of 20 ng/ml in children and adolescents [11].

To the best of our knowledge, to date, no systematic review has been conducted on the effect of vitamin D supplementation on serum 25-hydroxyvitamin D levels in children and adolescents worldwide. In previous original studies also the optimum level of 25-hydroxyvitamin D had not been determined [22-24], and because of lower power, the graded response to vitamin D supplementation could not be explored. This review will therefore aim at determining the

effectiveness of variable doses of vitamin D supplementation in children and adolescents for improving serum 25-hydroxyvitamin D concentrations and assessing the graded response to vitamin D supplementation.

**Methods**

*Objectives*

- To assess the effect of vitamin D supplementation on serum 25-hydroxyvitamin D concentration in children and adolescents.
- To determine the effectiveness of variable doses of vitamin D supplementation in children and adolescents for improving serum 25-hydroxyvitamin D concentrations.
- To determine if the effect of vitamin D supplementation on serum 25-hydroxyvitamin D varies by baseline vitamin D status, sex, body mass index, puberty status, or the type of vitamin D given.

*Types of studies*

We will include randomized controlled trials of vitamin D supplementation compared with placebo, no intervention control, or comparative arm studies, which examine the response to different doses of vitamin D supplementation (with or without a placebo arm), irrespective of their endpoint of interest, but they must have reported 25-hydroxyvitamin D level at baseline and at the end of the study.

*Types of participants*

Healthy children and adolescents (aged  $\leq 18$  years old) given vitamin D as a preventive measure of certain diseases or individuals with mild diseases that have no reason to have altered vitamin D metabolism.

Exclusion criteria:

- a) Rickets in children characterized by low 25(OH)D, below 15 ng/ml with radiologic or laboratory evidence requires higher doses of vitamin D supplementation (higher than those recommended for the general population).
- b) Individuals with chronic illnesses (chronic kidney disease (glomerular filtration rate at or below 30 ml/min), liver disease, heart failure (NYHA class 3 or more)
- c) Individuals with conditions or on drug therapy that might affect vitamin D metabolism and vitamin D binding protein /metabolism (anticonvulsants, steroids, anti-fungal, malabsorption, bypass surgery)

### *Types of intervention*

Inclusion criteria:

Vitamin D (D2 or D3) supplementation of any dose, given orally, daily, weekly or monthly, with or without calcium supplementation

Exclusion criteria:

- a) Studies that used active vitamin D supplementation as this type of supplementation is not recommended for the general population.
- b) Studies that used vitamin D supplementation given intra muscularly

c) Studies that used vitamin D supplementation as fortified foods as the amount of vitamin cannot be defined accurately

**Search methods for identification of studies**

**Electronic searches**

We will perform a systematic search of published randomized trials on vitamin D intervention in subjects aged  $\leq 18$  years old in PubMed, Scopus, ISI Web of Science, and Cochrane Central Register of Controlled Trials (CENTRAL) databases up to 27-Sep-2017 using eligible keywords in titles or abstracts (for details on search strategies see Supplementary File 1), using the following search terms: [Vitamin D or ergocalciferol or cholecalciferol or calcidiol or calcitriol] and [25-hydroxyvitamin D or hydroxyvitamin D or 25OHD or 25(OH)D or 25-OH-vitamin D or hydroxycholecalciferol or 25-hydroxy vitamin D or hydroxyergocalciferol] and [clinical trial or controlled trial]. Inclusion criteria will be the  $\leq 18$  years (children and adolescents) age group. The first search will be done without language restrictions using various combinations of relevant keywords. If any excess relevant keywords are identified during any of the electronic or other searches, search strategies will be modified to incorporate these terms and document the changes; we will also perform a complete updated search on all databases available and identify new studies (if any exist) for inclusion, assess them and incorporate the findings in our review.

**Searching other resources**

To complete the data bank, we will try to detect other potentially relevant studies with a clinical trial design by examining the reference list of the extracted articles in review articles.

**Data collection and analysis**

## Selection of studies

Two review authors (G.A., H.F.) will independently determine studies that should be evaluated further by scanning the abstract, title, or both, of every study retrieved based on inclusion/exclusion criteria. We will assess all potentially relevant articles as full texts and resolve any disagreement through consensus or consultation with a third review author for resolving differences and reaching consensus (F.H.). Also, an adapted PRISMA (Preferred Reporting Items for Systematic Reviews and Meta-Analyses) flow diagram will be presented to indicate the process of study selection [25].

## Data extraction and management

Two review authors (G.A., H.F.) will independently extract data based on inclusion and exclusion criteria including the method used (randomized clinical trial vs. other studies), and participant and intervention characteristics as described above. In first step the review authors will select articles via keywords or search reference lists of relevant studies, and in the second, full texts of selected articles will be retrieved and screened using inclusion and exclusion criteria. Finally, in third step, we will extract the relevant data from the articles selected in a structured data bank (G.A., H.F.). We will resolve any disagreement through consensus or consultation with a third review author for resolving differences (F.H.).

## Dealing with duplicate and companion publications

In case of duplicate papers or multiple publications of a primary study, we will enhance yield of information by collating all available data and use the most complete dataset aggregated across all known publications.

## Quality of assessment

The quality of each included study will be assessed independently by two review authors (G.A., H.F.). We will assess the quality assessment, focusing on the following criteria: Randomization, allocation concealment, blinding of personnel and of participants, incomplete outcome data, selective reporting and other potential sources of bias using Jadad scales [26]. We will resolve disagreements in quality assessments by consensus, or by consultation with a third review author (F.H.).

**Data synthesis**

We will present data of all included studies and provide a description of results, including population studies, interventions, and outcome in details in both summary tables and the text. Also, a meta-analysis using fixed- or random-effects modeling will be conducted to summarize weighed mean differences and 95% CI in 25-OH-D from baseline to follow-up during the supplementation [27, 28]. We first perform graphical exploration of variability of changes in 25-hydroxyvitamin D levels due to vitamin D doses. A potential nonlinear or linear dose-response relationship between vitamin D supplementation and serum 25-hydroxyvitamin D concentration will be modelled by using restricted cubic splines. We will fit meta-regression models for prediction of linear change in 25-hydroxyvitamin D concentration. We will complete statistical analyses based on the statistical guidelines contained in the latest version of the Cochrane Handbook for Systematic Reviews of Interventions [29].

If we are faced with any missing data in some studies in the process of analysis and data extraction and if we have proper evidence that indicate the randomness of these missing data, we will use data from existence data analysis, otherwise we will obtain the missing data from the study authors if possible; an alternate method where the value of some indices, including mean

or standard deviation are not reported for outcomes is to impute these values by assuming the mean, standard deviation of the missing data to be the average of the mean or standard deviation of data from those studies where this information was given. To investigate the impact of imputation on meta-analyses, we will use sensitivity analysis.

### Assessment of heterogeneity

Any clinical, methodological or statistical heterogeneity of the data will be investigated via visual inspection of the forest plots and using  $\text{Chi}^2$  test on  $N-1$  degrees of freedom (df), with significance level of  $\alpha = 0.1$ . If the power of this test is low, we will also calculate heterogeneity by  $I^2$ , a transformation of the square root of the  $\text{Chi}^2$  test divided by its df [30]. If the values of  $I^2$  is high we will have greater heterogeneity [31]; should there be heterogeneity in our investigation, we will assess the individual study and subgroup characteristics and perform a sensitivity analyses to clarify the reasons of this heterogeneity [32].

### Assessment of publication biases

Publication bias will be assessed using funnel plot and statistical analysis of Eggers' test [33, 34]. We will only test for funnel plot asymmetry if the review has included over 10 studies that assess a specific outcome.

### Subgroup analysis

After the final search and screening, if a sufficient number of studies are available, we will perform subgroup analyses and investigate interactions based on the following: Characteristics of participants, intervention, and outcomes including sex, 25-hydroxy vitamin D baseline level, puberty status, season, latitude, type of vitamin D, calcium supplementation, compliance, length

of intervention, frequency of intervention, doses of vitamin D supplementation, and quality of studies.

**Sensitivity analysis**

We will carry out sensitivity analyses because of the exploring the influence of following factors on effect sizes and validity of the estimations:

1. Investigation of the impact of quality assessment on the results
2. An analysis of the influence of various characteristics of studies using the following filters, including duration of intervention, sex, language of publication, country, and dose of administration
3. An assessment of the effect of different variance imputations.

**Discussion**

The importance of vitamin D for bone health as well as its role as a hormone in non-skeletal functions has long been understood. However, to date, no systematic review has been conducted on the effect of vitamin D supplementation on serum 25-hydroxyvitamin D levels in children and adolescents worldwide. The findings of this review will provide the existing evidence regarding the effectiveness of variable doses of vitamin D supplementation in children and adolescents for improving serum 25-hydroxyvitamin D concentrations. Our research will also provide guidance to general practitioners, nutritionist, and researchers on the skeletal and extra-skeletal outcomes and the long term safety of supplementation of various doses of vitamin D in this age group.

**Ethics and dissemination:** Ethics approval is not required because the work is carried out on published documents. The authors will publish findings from this review through peer-reviewed publication or conference presentations.

**Acknowledgements:** We wish to acknowledge Ms N shiva for critically editing the english grammar and syntax of the manuscript.

**Contributors:** G A and F H contributed to the design and conception of the study. G A, H F, and N M contributed to drafting manuscript and critical revision of manuscript. P M, F H, and F A supervised the study. All authors approved the final version of the manuscript.

**Funding:** This research received no specific grant from any funding agency in the public, commercial or not-for-profit sectors.

**Competing interests:** None declared.

**Provenance and peer review:** Not commissioned; externally peer reviewed.

References

1. Hilger J, Friedel A, Herr R, Rausch T, Roos F, Wahl DA, et al. A systematic review of vitamin D status in populations worldwide. *The British journal of nutrition*. 2014;111:23-45.

2. Kelishadi R, Ardalan G, Motlagh ME, Shariatinejad K, Heshmat R, Poursafa P, et al. National report on the association of serum vitamin D with cardiometabolic risk factors in the pediatric population of the Middle East and North Africa (MENA): the CASPIAN-III Study. *Nutrition (Burbank, Los Angeles County, Calif)*. 2014;30:33-8.

3. Neyestani TR, Hajifaraji M, Omidvar N, Eshraghian MR, Shariatzadeh N, Kalayi A, et al. High prevalence of vitamin D deficiency in school-age children in Tehran, 2008: a red alert. *Public health nutrition*. 2012;15:324-30.

4. Al-Daghri NM, Al-Saleh Y, Khan N, Sabico S, Aljohani N, Alfawaz H, et al. Sun exposure, skin color and vitamin D status in Arab children and adults. *The Journal of steroid biochemistry and molecular biology*. 2016.

5. Gharaibeh MA, Stoecker BJ. Assessment of serum 25(OH)D concentration in women of childbearing age and their preschool children in Northern Jordan during summer. *European journal of clinical nutrition*. 2009;63:1320-6.

6. Muhairi SJ, Mehairi AE, Khouri AA, Naqbi MM, Maskari FA, Al Kaabi J, et al. Vitamin D deficiency among healthy adolescents in Al Ain, United Arab Emirates. *BMC public health*. 2013;13:33.

7. Smith G, Wimalawansa SJ, Laillou A, Sophonneary P, Un S, Hong R, et al. High Prevalence of Vitamin D Deficiency in Cambodian Women: A Common Deficiency in a Sunny Country. *Nutrients*. 2016;8.

8. Al-Sadat N, Majid HA, Sim PY, Su TT, Dahlui M, Abu Bakar MF, et al. Vitamin D deficiency in Malaysian adolescents aged 13 years: findings from the Malaysian Health and Adolescents Longitudinal Research Team study (MyHeARTs). *BMJ open*. 2016;6:e010689.

9. Cashman KD, Dowling KG, Skrabakova Z, Gonzalez-Gross M, Valtuena J, De Henauw S, et al. Vitamin D deficiency in Europe: pandemic? *The American journal of clinical nutrition*. 2016;103:1033-44.

10. Rovner AJ, O'Brien KO. Hypovitaminosis D among healthy children in the United States: a review of the current evidence. *Archives of pediatrics & adolescent medicine*. 2008;162:513-9.
11. Chakhtoura M, El Ghandour S, Shawwa K, Akl EA, Arabi A, Mahfoud Z, et al. Vitamin D replacement in children, adolescents and pregnant women in the Middle East and North Africa: A systematic review and meta-analysis of randomized controlled trials. *Metabolism*. 2017;70:160-76.
12. Ross AC, Manson JE, Abrams SA, Aloia JF, Brannon PM, Clinton SK, et al. The 2011 report on dietary reference intakes for calcium and vitamin D from the Institute of Medicine: what clinicians need to know. *The Journal of clinical endocrinology and metabolism*. 2011;96:53-8.
13. Holick MF, Binkley NC, Bischoff-Ferrari HA, Gordon CM, Hanley DA, Heaney RP, et al. Evaluation, treatment, and prevention of vitamin D deficiency: an Endocrine Society clinical practice guideline. *The Journal of clinical endocrinology and metabolism*. 2011;96:1911-30.
14. The Society for Adolescent Health and Medicine. Recommended vitamin D intake and management of low vitamin D status in adolescents: a position statement of the society for adolescent health and medicine. *The Journal of adolescent health : official publication of the Society for Adolescent Medicine*. 2013;52:801-3.
15. Zittermann A, Ernst JB, Gummert JF, Borgermann J. Vitamin D supplementation, body weight and human serum 25-hydroxyvitamin D response: a systematic review. *European journal of nutrition*. 2014;53:367-74.
16. Parikh SJ, Edelman M, Uwaifo GI, Freedman RJ, Semega-Janneh M, Reynolds J, et al. The relationship between obesity and serum 1,25-dihydroxy vitamin D concentrations in healthy adults. *The Journal of clinical endocrinology and metabolism*. 2004;89:1196-9.
17. Lagunova Z, Porojnicu AC, Lindberg F, Hexeberg S, Moan J. The dependency of vitamin D status on body mass index, gender, age and season. *Anticancer research*. 2009;29:3713-20.
18. Shapses SA, Lee EJ, Sukumar D, Durazo-Arvizu R, Schneider SH. The effect of obesity on the relationship between serum parathyroid hormone and 25-hydroxyvitamin D in women. *The Journal of clinical endocrinology and metabolism*. 2013;98:E886-90.
19. Arunabh S, Pollack S, Yeh J, Aloia JF. Body fat content and 25-hydroxyvitamin D levels in healthy women. *The Journal of clinical endocrinology and metabolism*. 2003;88:157-61.

20. Vanlint S. Vitamin D and obesity. *Nutrients*. 2013;5:949-56.

21. Autier P, Gandini S, Mullie P. A systematic review: influence of vitamin D supplementation on serum 25-hydroxyvitamin D concentration. *The Journal of clinical endocrinology and metabolism*. 2012;97:2606-13.

22. Aloia JF, Patel M, Dimaano R, Li-Ng M, Talwar SA, Mikhail M, et al. Vitamin D intake to attain a desired serum 25-hydroxyvitamin D concentration. *The American journal of clinical nutrition*. 2008;87:1952-8.

23. Hall LM, Kimlin MG, Aronov PA, Hammock BD, Slusser JR, Woodhouse LR, et al. Vitamin D Intake Needed to Maintain Target Serum 25-Hydroxyvitamin D Concentrations in Participants with Low Sun Exposure and Dark Skin Pigmentation Is Substantially Higher Than Current Recommendations. *The Journal of nutrition*. 2010;140:542-50.

24. Vieth R. Vitamin D supplementation, 25-hydroxyvitamin D concentrations, and safety. *The American journal of clinical nutrition*. 1999;69:842-56.

25. Liberati A, Altman DG, Tetzlaff J, Mulrow C, Gøtzsche PC, Ioannidis JPA, et al. The PRISMA Statement for Reporting Systematic Reviews and Meta-Analyses of Studies That Evaluate Health Care Interventions: Explanation and Elaboration. *PLoS Medicine*. 2009;6:e1000100.

26. Jadad AR, Moore RA, Carroll D, Jenkinson C, Reynolds DJ, Gavaghan DJ, et al. Assessing the quality of reports of randomized clinical trials: is blinding necessary? *Controlled clinical trials*. 1996;17:1-12.

27. Wood L, Egger M, Gluud LL, Schulz KF, Jüni P, Altman DG, et al. Empirical evidence of bias in treatment effect estimates in controlled trials with different interventions and outcomes: meta-epidemiological study. *BMJ : British Medical Journal*. 2008;336:601-5.

28. Higgins J, Thompson SG, Spiegelhalter DJ. A re-evaluation of random-effects meta-analysis. *Journal of the Royal Statistical Society: Series A (Statistics in Society)*. 2009;172:137-59.

29. Higgins JPT, Altman DG, Sterne JAC (editors). Chapter 8: Assessing risk of bias in included studies. In: Higgins JPT, Green S (editors). *Cochrane Handbook for Systematic Reviews of Interventions* Version 5.1.0 (updated March 2011). The Cochrane Collaboration, 2011. Available from [www.cochrane-handbook.org](http://www.cochrane-handbook.org).

- 1  
2  
3 30. Higgins JP, Thompson SG. Quantifying heterogeneity in a meta-analysis. *Statistics in*  
4 *medicine*. 2002;21:1539-58.  
5  
6 31. Higgins JP, Green S. *Cochrane handbook for systematic reviews of interventions*: Wiley  
7 *Online Library*; 2008.  
8  
9 32. Baker WL, White CM, Cappelleri JC, Kluger J, Coleman CI. Understanding  
10 heterogeneity in meta-analysis: the role of meta-regression. *International journal of clinical*  
11 *practice*. 2009;63:1426-34.  
12  
13 33. Egger M, Davey Smith G, Schneider M, Minder C. Bias in meta-analysis detected by a  
14 simple, graphical test. *Bmj*. 1997;315:629-34.  
15  
16 34. Sterne JA, Sutton AJ, Ioannidis JP, Terrin N, Jones DR, Lau J, et al. Recommendations  
17 for examining and interpreting funnel plot asymmetry in meta-analyses of randomised controlled  
18 trials. *Bmj*. 2011;343:d4002.  
19  
20  
21  
22  
23  
24  
25  
26  
27  
28  
29  
30  
31  
32  
33  
34  
35  
36  
37  
38  
39  
40  
41  
42  
43  
44  
45  
46  
47  
48  
49  
50  
51  
52  
53  
54  
55  
56  
57  
58  
59  
60

**Last Updated September 27, 2017 (n=4019)**

**PubMed (n=549)**

(vitamin D[tiab] OR ergocalciferol[tiab] OR vitamin D2[tiab] OR cholecalciferol[tiab] OR vitamin D3[tiab] OR "ergocalciferols"[MeSH Terms] OR "cholecalciferol"[MeSH Terms]) AND ("clinical trial"[Publication Type] OR "clinical trials as topic"[MeSH Terms] OR "clinical trial"[All Fields]) OR controlled trial[all fields] OR ("clinical trial"[Publication Type] OR "clinical trials as topic"[MeSH Terms] OR "intervention study"[All Fields])) AND ("25-hydroxyvitamin D"[tiab] OR "25-hydroxy vitamin D"[tiab] OR hydroxyvitamin D[tiab] OR "25-hydroxyvitamin D2"[tiab] OR "25-hydroxy vitamin D2"[tiab] OR "hydroxyvitamin D2"[tiab] OR "25-hydroxyvitamin D3"[tiab] OR "25-hydroxy vitamin D3"[tiab] OR "hydroxyvitamin D3"[tiab] OR "25OHD"[tiab] OR "25OHD2"[tiab] OR "25OHD3"[tiab] OR "25OH D"[tiab] OR "25OH D3"[tiab] OR "25(OH)D"[tiab] OR "25(OH)D2"[tiab] OR "25(OH)D3"[tiab] OR "25(OH) vitamin D"[tiab] OR "25(OH) vitamin D2"[tiab] OR "25(OH) vitamin D3"[tiab] OR "25OH vitamin D"[tiab] OR "25OH vitamin D3"[tiab] OR 25-hydroxycalciferol[tiab] OR hydroxycholecalciferol[tiab] OR "25-hydroxycholecalciferol"[tiab] OR "25-OH cholecalciferol"[tiab] OR "25OH cholecalciferol"[tiab] OR "25-hydroxy cholecalciferol"[tiab] OR hydroxyergocalciferol[tiab] OR "25- hydroxyergocalciferol"[tiab] OR "25-hydroxy ergocalciferol"[tiab] OR calcitriol[tiab] OR calcidiol[tiab])

Limited by filter in the site to: Age birth to 18 years

**Scopus (n=3303)**

(TITLE-ABS ("vitamin D") OR TITLE-ABS (ergocalciferol) OR TITLE-ABS (cholecalciferol) OR TITLE-ABS ("vitamin D2") OR TITLE-ABS ("vitamin D3")) AND (TITLE-ABS ("25-hydroxyvitamin D") OR TITLE-ABS ("25-hydroxy vitamin D") OR TITLE-ABS ("hydroxyvitamin D") OR TITLE-ABS ("25-hydroxyvitamin D2") OR TITLE-ABS ("25-hydroxy vitamin D2") OR TITLE-ABS ("hydroxyvitamin D2") OR TITLE-ABS ("25-hydroxyvitamin D3") OR TITLE-ABS ("25-hydroxy vitamin D3") OR TITLE-ABS ("hydroxyvitamin D3") OR TITLE-ABS(25OHD) OR TITLE-ABS(25OHD2) OR TITLE-ABS(25OHD3) OR TITLE-ABS("25-OH-D") OR TITLE-ABS("25-OH-D2") OR TITLE-ABS("25-OH-D3") OR TITLE-ABS ("25(OH)D") OR TITLE-ABS ("25(OH)D2") OR TITLE-ABS ("25(OH)D3") OR TITLE-ABS ("25-OH-vitamin D") OR TITLE-ABS ("25-OH-vitamin D2") OR TITLE-ABS ("25-OH-vitamin D3") OR TITLE-ABS (hydroxycholecalciferol) OR TITLE-ABS (hydroxyergocalciferol) OR TITLE-ABS (calcitriol) OR TITLE-ABS (calcidiol)) AND (ALL ("clinical trial") OR ALL ("controlled trial"))

Limited by the filter in the site: exclusion Adults

**ISI Web of Science (n=320)**

(TS="vitamin D" OR TS=ergocalciferol OR TS="vitamin D2" OR TS=cholecalciferol OR TS="vitamin D3") AND (TS="25-hydroxyvitamin D" OR TS="25-hydroxy vitamin D" OR TS="hydroxyvitamin D" OR TS="25-hydroxyvitamin D2" OR TS="25-hydroxy vitamin D2" OR TS="hydroxyvitamin D2" OR TS="25-hydroxyvitamin D3" OR TS="25-hydroxy vitamin D3" OR TS="hydroxyvitamin D3" OR TS=25OHD OR TS= 25OHD2 OR TS= 25OHD3 OR TS="25(OH)D" OR TS="25(OH)D2" OR TS="25(OH)D3" OR TS="25OH D" OR TS="25OH D2" OR TS="25OH D3" OR TS="25-OH-vitamin D" OR TS="25-OH-vitamin D2" OR TS="25-OH-vitamin D3" OR TS=hydroxycholecalciferol OR TS=hydroxyergocalciferol OR TS=calcitriol OR TS= calcidiol) AND (TS="clinical trial" OR TS="controlled trial") AND (TS=child\* OR TS=adolesc\*)

### **Cochrane Central Register of Controlled Trials (CENTRAL) (n=552)**

("vitamin D":ti,ab,kw OR "ergocalciferol":ti,ab,kw OR "vitamin D-2":ti,ab,kw OR "vitamin D2":ti,ab,kw OR "cholecalciferol":ti,ab,kw OR "vitamin D-3":ti,ab,kw OR "vitamin D3":ti,ab,kw) AND

("25-hydroxyvitamin D":ti,ab,kw OR "25-hydroxy vitamin D":ti,ab,kw OR "hydroxyvitamin D":ti,ab,kw OR "25-hydroxyvitamin D2":ti,ab,kw OR "25-hydroxy vitamin D2":ti,ab,kw OR "25-hydroxyvitamin D3":ti,ab,kw OR "25-hydroxyvitamin D-3":ti,ab,kw OR "25-hydroxy vitamin D3":ti,ab,kw OR "hydroxyvitamin D3":ti,ab,kw OR "25OHD":ti,ab,kw OR "25OHD2":ti,ab,kw OR "25OHD3":ti,ab,kw OR "25OH D":ti,ab,kw OR "25OH D3":ti,ab,kw OR "25(OH)D":ti,ab,kw OR "25(OH)D2":ti,ab,kw OR "25(OH)D3":ti,ab,kw OR "25(OH) vitamin D":ti,ab,kw OR "25(OH) vitamin D2":ti,ab,kw OR "25(OH) vitamin D3":ti,ab,kw OR "25OH vitamin D":ti,ab,kw OR "25OH vitamin D3":ti,ab,kw OR "25-hydroxycalciferol":ti,ab,kw OR "hydroxycalciferol":ti,ab,kw OR "25-hydroxycholecalciferol":ti,ab,kw OR "hydroxycholecalciferol":ti,ab,kw OR "25-OH cholecalciferol":ti,ab,kw OR "25-hydroxy cholecalciferol":ti,ab,kw OR "hydroxyergocalciferol":ti,ab,kw OR "25- hydroxyergocalciferol":ti,ab,kw OR "calcitriol":ti,ab,kw OR "calcidiol":ti,ab,kw) AND

("Child":ti,ab,kw OR "adolescence":ti,ab,kw OR "adolescent":ti,ab,kw)

# BMJ Open

## Effect of vitamin D supplementation on serum 25-hydroxyvitamin D concentration in children and adolescents: A systematic review and meta-analysis protocol

|                                  |                                                                                                                                                                                                                                                                                                                                                                                                                                                                                                                                                                                                                                                                                                                                                                                                                                                                                                                                 |
|----------------------------------|---------------------------------------------------------------------------------------------------------------------------------------------------------------------------------------------------------------------------------------------------------------------------------------------------------------------------------------------------------------------------------------------------------------------------------------------------------------------------------------------------------------------------------------------------------------------------------------------------------------------------------------------------------------------------------------------------------------------------------------------------------------------------------------------------------------------------------------------------------------------------------------------------------------------------------|
| Journal:                         | <i>BMJ Open</i>                                                                                                                                                                                                                                                                                                                                                                                                                                                                                                                                                                                                                                                                                                                                                                                                                                                                                                                 |
| Manuscript ID                    | bmjopen-2018-021636.R1                                                                                                                                                                                                                                                                                                                                                                                                                                                                                                                                                                                                                                                                                                                                                                                                                                                                                                          |
| Article Type:                    | Protocol                                                                                                                                                                                                                                                                                                                                                                                                                                                                                                                                                                                                                                                                                                                                                                                                                                                                                                                        |
| Date Submitted by the Author:    | 24-May-2018                                                                                                                                                                                                                                                                                                                                                                                                                                                                                                                                                                                                                                                                                                                                                                                                                                                                                                                     |
| Complete List of Authors:        | Asghari, Golaleh; National Nutrition and Food Technology Research Institute, Shahid Beheshti University of Medical Sciences, Tehran, Iran, Department of Clinical Nutrition and Dietetics, Faculty of Nutrition Sciences and Food Technology<br>Farhadnejad, Hossein; National Nutrition and Food Technology Research Institute, Shahid Beheshti University of Medical Sciences, Tehran, Iran<br>Hosseinpanah, Farhad; Obesity Research Center, Research Institute for Endocrine Sciences, Shahid Beheshti University of Medical Sciences, Tehran, Iran<br>Moslehi, Nazanin; Shahid Beheshti University of Medical Sciences, Tehran, Iran<br>Mirmiran, Parvin; Nutrition and Endocrine Research Center, Research Institute for Endocrine Sciences, Shahid Beheshti University of Medical Sciences, Tehran, Iran<br>Azizi, Fereidoun; Research Institute for Endocrine Sciences, Shahid Beheshti University of Medical Sciences, |
| <b>Primary Subject Heading</b> : | Nutrition and metabolism                                                                                                                                                                                                                                                                                                                                                                                                                                                                                                                                                                                                                                                                                                                                                                                                                                                                                                        |
| Secondary Subject Heading:       | Nutrition and metabolism, Public health                                                                                                                                                                                                                                                                                                                                                                                                                                                                                                                                                                                                                                                                                                                                                                                                                                                                                         |
| Keywords:                        | Vitamin D, 25-hydroxyvitamin D, children, adolescents, meta-analysis                                                                                                                                                                                                                                                                                                                                                                                                                                                                                                                                                                                                                                                                                                                                                                                                                                                            |
|                                  |                                                                                                                                                                                                                                                                                                                                                                                                                                                                                                                                                                                                                                                                                                                                                                                                                                                                                                                                 |

SCHOLARONE™  
Manuscripts

**Effect of vitamin D supplementation on serum 25-hydroxyvitamin D concentration in children and adolescents: A systematic review and meta-analysis protocol**

Golaleh Asghari<sup>1</sup>, Hossein Farhadnejad<sup>1</sup>, Farhad Hosseinpanah<sup>3</sup>, Nazanin Moslehi<sup>1</sup>, Parvin Mirmiran<sup>2</sup>, Fereidoun Azizi<sup>4</sup>

<sup>1</sup>Department of Clinical Nutrition and Dietetics, Faculty of Nutrition Sciences and Food Technology, National Nutrition and Food Technology Research Institute, Shahid Beheshti University of Medical Sciences, Tehran, Iran

<sup>2</sup>Nutrition and Endocrine Research Center, Research Institute for Endocrine Sciences, Shahid Beheshti University of Medical Sciences, Tehran, Iran

<sup>3</sup>Obesity Research Center, Research Institute for Endocrine Sciences, Shahid Beheshti University of Medical Sciences, Tehran, Iran

<sup>4</sup>Endocrine Research Center, Research Institute for Endocrine Sciences, Shahid Beheshti University of Medical Sciences, Tehran, Iran

**Correspondence to:**

Parvin Mirmiran  
Nutrition and Endocrine Research Center, Research Institute for Endocrine Science, Shahid Beheshti University of Medical Sciences, Tehran, Iran  
P.O. Box: 19395-4763  
Phone: +98 (21) 22432503  
Fax: +98 (21) 22402463  
E-mail: [mirmiran@endocrine.ac.ir](mailto:mirmiran@endocrine.ac.ir)  
Alternative E-mail: [parvin.mirmiran@gmail.com](mailto:parvin.mirmiran@gmail.com)

## 1 Abstract

2 **Introduction:** The importance of vitamin D for bone health as well as its role in non-skeletal  
3 functions has long been documented. However, review investigations on the effect of vitamin D  
4 supplementation on serum 25-hydroxyvitamin D levels in children and adolescents are scarce.  
5 The aim of current study was to assess the impact of various doses of vitamin D supplementation  
6 on serum 25(OH)D concentrations in children and adolescents, and to identify relevant  
7 determinants of variations in the effect of vitamin D supplementation.

8 **Methods:** PubMed, Scopus, ISI Web of Science, and Cochrane Central Register of Controlled  
9 Trials (CENTRAL) databases up to the 27-Sep-2017 will systematically be searched for  
10 randomized controlled trials of vitamin D supplementation. We considered articles with the  
11 following control groups as eligible: placebo control, control group without any  
12 supplementation, or a comparative arm investigation. Two reviewers will assess articles for  
13 eligibility according to pre-specified selection criteria, after which data extraction and quality  
14 appraisal will be conducted by 2 independent reviewers. The quality assessment will be assessed  
15 using Jadad scales. Meta-analyses will be conducted where appropriate. We will express  
16 continuous measures (i.e serum 25(OH)D concentration) as mean differences (MDs) with 95%  
17 CIs. Heterogeneity of the data will be investigated via visual inspection of the forest plots and  
18 using Chi<sup>2</sup> test on N-1 degrees of freedom, with a significance level of  $\alpha=0.1$ . We will also  
19 assess the individual study and subgroup characteristics and perform a sensitivity analysis.  
20 Publication bias will be assessed using funnel plot and statistical analysis of Eggers' test.

1  
2  
3  
4  
5  
6  
7  
8  
9  
10  
11  
12  
13  
14  
15  
16  
17  
18  
19  
20  
21  
22  
23  
24  
25  
26  
27  
28  
29  
30  
31  
32  
33  
34  
35  
36  
37  
38  
39  
40  
41  
42  
43  
44  
45  
46  
47  
48  
49  
50  
51  
52  
53  
54  
55  
56  
57  
58  
59  
60

**Ethics and dissemination:** Ethics approval is not required because the work is carried out on published documents. The authors will publish findings from this review through peer-reviewed publication or conference presentations.

**Prospero registration number:** PROSPERO CRD42017067179.

**Keywords:** Vitamin D; 25-hydroxyvitamin D; Children; Adolescents; Supplementation; Systematic review

For peer review only

## 27 **Strengths and limitations of this study**

- 28       • This systematic review will comprehensively assess the effectiveness and safety of  
29       various doses of vitamin D supplementation in children and adolescents for improving  
30       serum 25(OH)D concentrations.
- 31       • The study screening, data extraction and quality assessment will be fulfilled by two  
32       independent reviewers.
- 33       • Based on previous reviews dealing with vitamin D we expect considerable heterogeneity  
34       of our data that might be due to variables, including sex, 25(OH)D baseline level, length  
35       of intervention, frequency of intervention, doses of vitamin D supplementation.
- 36       • The systematic review will include only published data.

1  
2  
3  
4  
5  
6  
7  
8  
9  
10  
11  
12  
13  
14  
15  
16  
17  
18  
19  
20  
21  
22  
23  
24  
25  
26  
27  
28  
29  
30  
31  
32  
33  
34  
35  
36  
37  
38  
39  
40  
41  
42  
43  
44  
45  
46  
47  
48  
49  
50  
51  
52  
53  
54  
55  
56  
57  
58  
59  
60

**Introduction**

The importance of vitamin D for bone health as well as its role in non-skeletal functions has long been clarified [1]. Currently, vitamin D deficiency is a global problem, and a recent systematic review found that about 37% of the studies reported an average of less than 20 ng/ml for 25-hydroxyvitamin D [2]. Since childhood and adolescence life cycles increase vitamin requirements for the growth of muscle and bone, vitamin D deficiency is also significantly observed during this period [3]. Low vitamin D status has recently been reported in children and adolescents across countries of the Middle East such as Iran [4, 5], Saudi Arabia [6], Jordan [7], and United Arab Emirates [8], as well as in South East Asia [9, 10], Europe [11], and the United States [12].

Serum level of 25(OH)D is a commonly used marker of the long-term vitamin D nutritional status of individuals. Exposure to sunlight is the most important factor in the synthesis of vitamin D, which is dependent on skin color, latitude, season, lifestyle, and dress codes based on the cultural beliefs of individuals [3]. Dietary intake of limited foods such as fatty fish, egg yolk, cheese, and fortified foods with vitamin D and also supplementation of vitamin D may increase 25(OH)D concentrations [13, 14]. Previous studies in adults showed that baseline 25-hydroxyvitamin D, concurrent calcium intakes, and the level of overweight and obesity are among other factors which may affect 25(OH)D in response to vitamin D supplementation [15]. Although many trials have evaluated the effects of vitamin D supplementation on clinical outcomes, few attempts have been made for evaluating the influence of various doses of vitamin D supplementation on serum 25(OH)D levels in children and adolescents [16], a factor crucial for stipulating dietary recommendations. Based on recommendations of the Institute of Medicine (IOM) in 2011, the recommended dietary allowance (RDA) is 600 IU for 9-18-year old children

and adolescents [17], whereas based on recommendations of the Endocrine Society, 9-18-year old children and adolescents need at least 600 IU of vitamin D daily, and at least 1000 IU of vitamin D is essential to maintain levels of 25(OH)D > 30 ng/ml [3]; this controversy may be explained by the fact that IOM recommendations are based on achieving the target level of  $\geq 20$  ng/ml for 25-hydroxyvitamin D, while the Endocrine society recommendation is based on achieving  $\geq 30$  ng/ml. The Society for Adolescent Health and Medicine suggests 600 IU vitamin D for healthy adolescents and at least 1000 IU for those at risk of vitamin D deficiency, such as obese ones [18], emphasizing the differences in recommendations of these two scientific societies.

Previous studies have shown that obesity might also influence 25(OH)D, 1,25-hydroxyvitamin D, and parathyroid hormone levels [19-21]. A systematic review in adults found that the average increase in serum 25(OH)D concentrations was 0.78 ng/ml per mcg of vitamin D<sub>3</sub> per day [22]. Recently a review study from the Middle East and North Africa (MENA) region showed that intakes of intermediate vitamin D dose of 1000–2000 IU daily may be necessary to facilitate for achievement of 25(OH)D level of 20 ng/ml in children and adolescents [16].

To the best of our knowledge, to date, no systematic review has been conducted on the effect of vitamin D supplementation on serum 25(OH)D levels in children and adolescents worldwide. In previous original studies also the optimum level of 25(OH)D had not been determined [13, 23, 24], and because of lower power, the graded response to vitamin D supplementation could not be explored. This review will therefore aim at determining the effectiveness of various doses of vitamin D supplementation in children and adolescents for improving serum 25(OH)D concentrations and assessing the graded response to vitamin D supplementation. Secondly, we

1  
2  
3  
4  
5  
6  
7  
8  
9  
10  
11  
12  
13  
14  
15  
16  
17  
18  
19  
20  
21  
22  
23  
24  
25  
26  
27  
28  
29  
30  
31  
32  
33  
34  
35  
36  
37  
38  
39  
40  
41  
42  
43  
44  
45  
46  
47  
48  
49  
50  
51  
52  
53  
54  
55  
56  
57  
58  
59  
60

82 aimed to determine if the effect of vitamin D supplementation on serum 25(OH)D varies by  
83 baseline vitamin D status, sex, body mass index, puberty status, or the type of vitamin D given.

84 **Methods**

85 *Types of studies*

86 We will include randomized controlled trials of vitamin D supplementation with placebo, no  
87 intervention control, or comparative arm studies. Comparative arm is an arm type in which a  
88 group of participants receives another dose of vitamin D, or fortified foods with vitamin D, or  
89 other micronutrients such as vitamin E during the clinical trial. Also, all of included studies must  
90 have reported 25(OH)D level at baseline and at the end of the study.

91 *Types of participants*

92 Healthy children and adolescents (aged  $\leq 18$  years old) given vitamin D as a preventive measure  
93 of certain diseases or individuals with mild diseases (such as flu, obesity, asthma, hypertension,  
94 and etc.) that have no reason to have altered vitamin D metabolism.

95 Exclusion criteria:

96 a) Rickets in children characterized by low 25(OH)D , below 15 ng/ml with radiologic or  
97 laboratory evidence requires higher doses of vitamin D supplementation (higher than those  
98 recommended for the general population).

99 b) Individuals with chronic illnesses (chronic kidney disease (glomerular filtration rate at or  
100 below 30 ml/min), liver disease, heart failure (New York Heart Association class 3 or more)

1  
2  
3 101 c) Individuals with conditions or on drug therapy that might affect vitamin D metabolism and  
4  
5 102 vitamin D binding protein /metabolism (anticonvulsants, steroids, anti-fungal, malabsorption,  
6  
7 103 bypass surgery)  
8  
9

10  
11 104 *Types of intervention*  
12

13  
14 105 Inclusion criteria:  
15

16  
17 106 Vitamin D (D2 or D3) supplementation of any dose, given orally, daily, weekly or monthly, with  
18  
19 107 or without calcium supplementation  
20

21  
22 108 Exclusion criteria:  
23

24  
25 109 a) Studies that used active vitamin D supplementation (1,25-dihydroxyvitamin D) as this type of  
26  
27 110 supplementation is not recommended for the general population.  
28

29  
30 111 b) Studies that used vitamin D supplementation given intra muscularly  
31

32  
33 112 c) Studies that used vitamin D supplementation as fortified foods as the amount of vitamin  
34  
35 113 cannot be defined accurately  
36

37  
38 114 **Search methods for identification of studies**  
39

40  
41 115 **Electronic searches**  
42

43  
44 116 We will perform a systematic search of published randomized trials on vitamin D  
45  
46 117 supplementation in subjects aged  $\leq 18$  years old in PubMed, Scopus, ISI Web of Science, and  
47  
48 118 Cochrane Central Register of Controlled Trials (CENTRAL) databases up to 27-Sep-2017 using  
49  
50 119 eligible keywords in titles or abstracts (for details on search strategies see Supplementary File 1),  
51  
52 120 using the following search terms: [Vitamin D or ergocalciferol or cholecalciferol or calcidiol or  
53  
54  
55

calcitriol] and [25-hydroxyvitamin D or hydroxyvitamin D or 25OHD or 25(OH)D or 25-OH-vitamin D or hydroxycholecalciferol or 25-hydroxy vitamin D or hydroxyergocalciferol] and [clinical trial or controlled trial]. Inclusion criteria will be the  $\leq 18$  years (children and adolescents) age group. The first search will be done without language restrictions using various combinations of relevant keywords. We will also perform a complete updated search on all databases available and identify new studies (if any exist) for inclusion, assess them and incorporate the findings in our review.

**Searching other resources**

To complete the data bank, we will use snowballing techniques to complement the database searches by screening the reference lists of included articles for relevant studies.

**Data collection and analysis**

**Selection of studies**

Two authors (G.A., H.F.) will independently determine studies that should be evaluated further by scanning the title, abstract, or both, of every study retrieved based on inclusion/exclusion criteria. We will assess all potentially relevant articles as full texts and resolve any disagreement through consensus or consultation with a third review author for resolving differences and reaching consensus (F.H.). Also, an adapted PRISMA (Preferred Reporting Items for Systematic Reviews and Meta-Analyses) flow diagram will be presented to indicate the process of study selection [25].

**Data extraction and management**

1  
2  
3 141 In the first step, two authors (G.A., H.F.) will independently select articles by title and abstract or  
4  
5 142 search reference lists of relevant studies, and in the second, full texts of selected articles will be  
6  
7 143 retrieved and screened using inclusion and exclusion criteria (study design, participants, and  
8  
9 144 intervention). Finally, in the third step, we will extract the relevant data from the selected articles  
10  
11 145 in a structured data bank (G.A., H.F.). We will resolve any disagreement through consensus or  
12  
13 146 consultation with a third author for resolving differences (F.H.).  
14  
15  
16

### 17 147 **Dealing with duplicate and companion publications**

18  
19  
20 148 In case of duplicate papers or multiple publications of a primary study, we will enhance yield of  
21  
22 149 information by collating all available data and use the most complete dataset aggregated across  
23  
24 150 all known publications.  
25  
26

### 27 151 **Quality of assessment**

28  
29  
30 152 The quality of each included study will be assessed independently by two authors (G.A., H.F.).  
31  
32 153 We will assess the quality assessment, focusing on the following criteria: Randomization,  
33  
34 154 allocation concealment, blinding of personnel and of participants, incomplete outcome data,  
35  
36 155 selective reporting and other potential sources of bias using Jadad scales [26]. We will resolve  
37  
38 156 disagreements in quality assessments by consensus, or by consultation with a third author (F.H.).  
39  
40  
41  
42

### 43 157 **Data synthesis**

44  
45  
46 158 We will present data of all included studies and provide a description of results, including study  
47  
48 159 population, interventions, and outcome in details in both summary tables and the text. Also, a  
49  
50 160 meta-analysis using fixed- or random-effects modeling will be conducted to summarize weighed  
51  
52 161 mean differences and 95% CI in 25(OH)D from baseline to follow-up during the  
53  
54  
55

1  
2  
3  
4  
5  
6  
7  
8  
9  
10  
11  
12  
13  
14  
15  
16  
17  
18  
19  
20  
21  
22  
23  
24  
25  
26  
27  
28  
29  
30  
31  
32  
33  
34  
35  
36  
37  
38  
39  
40  
41  
42  
43  
44  
45  
46  
47  
48  
49  
50  
51  
52  
53  
54  
55  
56  
57  
58  
59  
60

supplementation [27, 28]. We first perform graphical exploration of variability of changes in 25(OH)D levels due to vitamin D doses. A potential nonlinear or linear dose-response relationship between vitamin D supplementation and serum 25(OH)D concentration will be modelled by using restricted cubic splines. We will fit meta-regression models for prediction of linear change in 25(OH)D concentration. We will complete statistical analyses based on the statistical guidelines contained in the latest version of the Cochrane Handbook for Systematic Reviews of Interventions [29].

If we are faced with any missing data in some studies in the process of analysis and data extraction and if we have proper evidence that indicate the randomness of these missing data, we will use data from existence data analysis, otherwise we will obtain the missing data from the study authors if possible; an alternate method where the value of some indices, including mean or standard deviation are not reported for outcomes is to impute these values by assuming the mean, standard deviation of the missing data to be the average of the mean or standard deviation of data from those studies where this information was given. To investigate the impact of imputation on meta-analyses, we will use sensitivity analysis.

**Assessment of heterogeneity**

Any clinical, methodological or statistical heterogeneity of the data will be investigated via visual inspection of the forest plots and using Chi<sup>2</sup> test on N-1 degrees of freedom (df), with significance level of  $\alpha = 0.1$ . If the power of this test is low, we will also calculate heterogeneity by  $I^2$ , a transformation of the square root of the Chi<sup>2</sup> test divided by its df [30]. If the values of  $I^2$  is high we will have greater heterogeneity [31]; should there be heterogeneity in our

1  
2  
3 183 investigation, we will assess the individual study and subgroup characteristics and perform a  
4  
5 184 sensitivity analyses to clarify the reasons of this heterogeneity [32].  
6  
7

### 8 185 **Assessment of publication biases**

9

10  
11 186 Publication bias will be assessed using funnel plot and statistical analysis of Eggers' test [33,  
12  
13 187 34]. We will only test for funnel plot asymmetry if the review has included over 10 studies that  
14  
15 188 assess a specific outcome.  
16  
17

### 18 189 **Subgroup analysis**

19

20  
21  
22 190 After the final search and screening, if a sufficient number of studies are available, we will  
23  
24 191 perform subgroup analyses and investigate interactions based on the following: Characteristics of  
25  
26 192 participants, intervention, and outcomes including sex, 25-hydroxy vitamin D baseline level,  
27  
28 193 puberty status, season, latitude, type of vitamin D, calcium supplementation, compliance, length  
29  
30 194 of intervention, frequency of intervention, doses of vitamin D supplementation, and quality of  
31  
32 195 studies.  
33  
34

### 35 196 **Sensitivity analysis**

36

37  
38  
39 197 We will carry out sensitivity analyses because of the exploring the influence of following factors  
40  
41 198 on effect sizes and validity of the estimations:  
42  
43

- 44  
45 199 1. Investigation of the impact of quality assessment on the results  
46  
47 200 2. An analysis of the influence of various characteristics of studies using the following  
48  
49 201 filters, including duration of intervention, sex, language of publication, country, and dose  
50  
51 202 of administration  
52  
53 203 3. An assessment of the effect of different variance imputations.  
54  
55

1  
2  
3  
4  
5  
6  
7  
8  
9  
10  
11  
12  
13  
14  
15  
16  
17  
18  
19  
20  
21  
22  
23  
24  
25  
26  
27  
28  
29  
30  
31  
32  
33  
34  
35  
36  
37  
38  
39  
40  
41  
42  
43  
44  
45  
46  
47  
48  
49  
50  
51  
52  
53  
54  
55  
56  
57  
58  
59  
60

**Patient and public involvement**

Patients and/or public are not involved in this study.

**Summary statement**

The findings of this review will provide the existing evidence regarding the effectiveness of various doses of vitamin D supplementation in children and adolescents for improving serum 25(OH)D concentrations. Our research will also provide guidance to general practitioners, nutritionist, and researchers on the skeletal and extra-skeletal outcomes and the long term safety of supplementation of various doses of vitamin D in this age group.

**Ethics and dissemination:** Ethics approval is not required because the work is carried out on published documents. The authors will publish findings from this review through peer-reviewed publication or conference presentations.

**Acknowledgements:** We wish to acknowledge Ms N shiva for critically editing the English grammar and syntax of the manuscript.

**Contributors:** GA had the original idea of this work. GA, HF, and FH designed and conceived the protocol. NM designed the search strategies. PM proposed some important advice for the study design and revision PM and FA aided in developing the research questions. All authors critically revised the draft of the manuscript and approved its final version. GA and HF are the guarantors of the review.

**Funding:** This research received no specific grant from any funding agency in the public, commercial or not-for-profit sectors.

**Competing interests:** None declared.

225 **Provenance and peer review:** Not commissioned; externally peer reviewed.

For peer review only

References

1. Rosen CJ, Adams JS, Bikle DD, Black DM, Demay MB, Manson JE, et al. The nonskeletal effects of vitamin D: an Endocrine Society scientific statement. *Endocrine reviews*. 2012;33:456-92.

2. Hilger J, Friedel A, Herr R, Rausch T, Roos F, Wahl DA, et al. A systematic review of vitamin D status in populations worldwide. *The British journal of nutrition*. 2014;111:23-45.

3. Holick MF, Binkley NC, Bischoff-Ferrari HA, Gordon CM, Hanley DA, Heaney RP, et al. Evaluation, treatment, and prevention of vitamin D deficiency: an Endocrine Society clinical practice guideline. *The Journal of clinical endocrinology and metabolism*. 2011;96:1911-30.

4. Kelishadi R, Ardalan G, Motlagh ME, Shariatinejad K, Heshmat R, Poursafa P, et al. National report on the association of serum vitamin D with cardiometabolic risk factors in the pediatric population of the Middle East and North Africa (MENA): the CASPIAN-III Study. *Nutrition (Burbank, Los Angeles County, Calif)*. 2014;30:33-8.

5. Neyestani TR, Hajifaraji M, Omidvar N, Eshraghian MR, Shariatzadeh N, Kalayi A, et al. High prevalence of vitamin D deficiency in school-age children in Tehran, 2008: a red alert. *Public health nutrition*. 2012;15:324-30.

6. Al-Daghri NM, Al-Saleh Y, Khan N, Sabico S, Aljohani N, Alfawaz H, et al. Sun exposure, skin color and vitamin D status in Arab children and adults. *The Journal of steroid biochemistry and molecular biology*. 2016.

7. Gharaibeh MA, Stoecker BJ. Assessment of serum 25(OH)D concentration in women of childbearing age and their preschool children in Northern Jordan during summer. *European journal of clinical nutrition*. 2009;63:1320-6.

8. Muhairi SJ, Mehairi AE, Khouri AA, Naqbi MM, Maskari FA, Al Kaabi J, et al. Vitamin D deficiency among healthy adolescents in Al Ain, United Arab Emirates. *BMC public health*. 2013;13:33.

9. Smith G, Wimalawansa SJ, Laillou A, Sophonneary P, Un S, Hong R, et al. High Prevalence of Vitamin D Deficiency in Cambodian Women: A Common Deficiency in a Sunny Country. *Nutrients*. 2016;8.

10. Al-Sadat N, Majid HA, Sim PY, Su TT, Dahlui M, Abu Bakar MF, et al. Vitamin D deficiency in Malaysian adolescents aged 13 years: findings from the Malaysian Health and Adolescents Longitudinal Research Team study (MyHeARTs). *BMJ open*. 2016;6:e010689.

11. Cashman KD, Dowling KG, Skrabakova Z, Gonzalez-Gross M, Valtuena J, De Henauw S, et al. Vitamin D deficiency in Europe: pandemic? *The American journal of clinical nutrition*. 2016;103:1033-44.

12. Rovner AJ, O'Brien KO. Hypovitaminosis D among healthy children in the United States: a review of the current evidence. *Archives of pediatrics & adolescent medicine*. 2008;162:513-9.
13. Aloia JF, Patel M, Dimaano R, Li-Ng M, Talwar SA, Mikhail M, et al. Vitamin D intake to attain a desired serum 25-hydroxyvitamin D concentration. *The American journal of clinical nutrition*. 2008;87:1952-8.
14. Smith TJ, Tripkovic L, Damsgaard CT, Molgaard C, Ritz C, Wilson-Barnes SL, et al. Estimation of the dietary requirement for vitamin D in adolescents aged 14-18 y: a dose-response, double-blind, randomized placebo-controlled trial. *The American journal of clinical nutrition*. 2016;104:1301-9.
15. Zittermann A, Ernst JB, Gummert JF, Borgermann J. Vitamin D supplementation, body weight and human serum 25-hydroxyvitamin D response: a systematic review. *European journal of nutrition*. 2014;53:367-74.
16. Chakhtoura M, El Ghandour S, Shawwa K, Akl EA, Arabi A, Mahfoud Z, et al. Vitamin D replacement in children, adolescents and pregnant women in the Middle East and North Africa: A systematic review and meta-analysis of randomized controlled trials. *Metabolism*. 2017;70:160-76.
17. Ross AC, Manson JE, Abrams SA, Aloia JF, Brannon PM, Clinton SK, et al. The 2011 report on dietary reference intakes for calcium and vitamin D from the Institute of Medicine: what clinicians need to know. *The Journal of clinical endocrinology and metabolism*. 2011;96:53-8.
18. The Society for Adolescent Health and Medicine. Recommended vitamin D intake and management of low vitamin D status in adolescents: a position statement of the society for adolescent health and medicine. *The Journal of adolescent health : official publication of the Society for Adolescent Medicine*. 2013;52:801-3.
19. Parikh SJ, Edelman M, Uwaifo GI, Freedman RJ, Semega-Janneh M, Reynolds J, et al. The relationship between obesity and serum 1,25-dihydroxy vitamin D concentrations in healthy adults. *The Journal of clinical endocrinology and metabolism*. 2004;89:1196-9.
20. Lagunova Z, Porojnicu AC, Lindberg F, Hexeberg S, Moan J. The dependency of vitamin D status on body mass index, gender, age and season. *Anticancer research*. 2009;29:3713-20.
21. Shapses SA, Lee EJ, Sukumar D, Durazo-Arvizu R, Schneider SH. The effect of obesity on the relationship between serum parathyroid hormone and 25-hydroxyvitamin D in women. *The Journal of clinical endocrinology and metabolism*. 2013;98:E886-90.
22. Autier P, Gandini S, Mullie P. A systematic review: influence of vitamin D supplementation on serum 25-hydroxyvitamin D concentration. *The Journal of clinical endocrinology and metabolism*. 2012;97:2606-13.
23. Hall LM, Kimlin MG, Aronov PA, Hammock BD, Slusser JR, Woodhouse LR, et al. Vitamin D Intake Needed to Maintain Target Serum 25-Hydroxyvitamin D Concentrations in Participants with Low

Sun Exposure and Dark Skin Pigmentation Is Substantially Higher Than Current Recommendations. The Journal of nutrition. 2010;140:542-50.

24. Vieth R. Vitamin D supplementation, 25-hydroxyvitamin D concentrations, and safety. The American journal of clinical nutrition. 1999;69:842-56.

25. Liberati A, Altman DG, Tetzlaff J, Mulrow C, Gøtzsche PC, Ioannidis JPA, et al. The PRISMA Statement for Reporting Systematic Reviews and Meta-Analyses of Studies That Evaluate Health Care Interventions: Explanation and Elaboration. PLoS Medicine. 2009;6:e1000100.

26. Jadad AR, Moore RA, Carroll D, Jenkinson C, Reynolds DJ, Gavaghan DJ, et al. Assessing the quality of reports of randomized clinical trials: is blinding necessary? Controlled clinical trials. 1996;17:1-12.

27. Wood L, Egger M, Gluud LL, Schulz KF, Jüni P, Altman DG, et al. Empirical evidence of bias in treatment effect estimates in controlled trials with different interventions and outcomes: meta-epidemiological study. BMJ : British Medical Journal. 2008;336:601-5.

28. Higgins J, Thompson SG, Spiegelhalter DJ. A re-evaluation of random-effects meta-analysis. Journal of the Royal Statistical Society: Series A (Statistics in Society). 2009;172:137-59.

29. Higgins JPT, Altman DG, Sterne JAC (editors). Chapter 8: Assessing risk of bias in included studies. In: Higgins JPT, Green S (editors). Cochrane Handbook for Systematic Reviews of Interventions Version 5.1.0 (updated March 2011). The Cochrane Collaboration, 2011. Available from [www.cochrane-handbook.org](http://www.cochrane-handbook.org).

30. Higgins JP, Thompson SG. Quantifying heterogeneity in a meta-analysis. Statistics in medicine. 2002;21:1539-58.

31. Higgins JP, Green S. Cochrane handbook for systematic reviews of interventions: Wiley Online Library; 2008.

32. Baker WL, White CM, Cappelleri JC, Kluger J, Coleman CI. Understanding heterogeneity in meta-analysis: the role of meta-regression. International journal of clinical practice. 2009;63:1426-34.

33. Egger M, Davey Smith G, Schneider M, Minder C. Bias in meta-analysis detected by a simple, graphical test. Bmj. 1997;315:629-34.

34. Sterne JA, Sutton AJ, Ioannidis JP, Terrin N, Jones DR, Lau J, et al. Recommendations for examining and interpreting funnel plot asymmetry in meta-analyses of randomised controlled trials. Bmj. 2011;343:d4002.

## Last Updated September 27, 2017 (n=4019)

### PubMed (n=549)

(vitamin D[tiab] OR ergocalciferol[tiab] OR vitamin D2[tiab] OR cholecalciferol[tiab] OR vitamin D3[tiab] OR "ergocalciferols"[MeSH Terms] OR "cholecalciferol"[MeSH Terms]) AND (("clinical trial"[Publication Type] OR "clinical trials as topic"[MeSH Terms] OR "clinical trial"[All Fields]) OR controlled trial[all fields] OR ("clinical trial"[Publication Type] OR "clinical trials as topic"[MeSH Terms] OR "intervention study"[All Fields])) AND ("25-hydroxyvitamin D"[tiab] OR "25-hydroxy vitamin D"[tiab] OR hydroxyvitamin D[tiab] OR "25-hydroxyvitamin D2"[tiab] OR "25-hydroxy vitamin D2"[tiab] OR "hydroxyvitamin D2"[tiab] OR "25-hydroxyvitamin D3"[tiab] OR "25-hydroxy vitamin D3"[tiab] OR "hydroxyvitamin D3"[tiab] OR "25OHD"[tiab] OR "25OHD2"[tiab] OR "25OHD3"[tiab] OR "25OH D"[tiab] OR "25OH D3"[tiab] OR "25(OH)D"[tiab] OR "25(OH)D2"[tiab] OR "25(OH)D3"[tiab] OR "25(OH) vitamin D"[tiab] OR "25(OH) vitamin D2"[tiab] OR "25(OH) vitamin D3"[tiab] OR "25OH vitamin D"[tiab] OR "25OH vitamin D3"[tiab] OR 25-hydroxycalciferol[tiab] OR hydroxycholecalciferol[tiab] OR "25-hydroxycholecalciferol"[tiab] OR "25-OH cholecalciferol"[tiab] OR "25OH cholecalciferol"[tiab] OR "25-hydroxy cholecalciferol"[tiab] OR hydroxyergocalciferol[tiab] OR "25- hydroxyergocalciferol"[tiab] OR "25-hydroxy ergocalciferol"[tiab] OR calcitriol[tiab] OR calcidiol[tiab])

Limited by filter in the site to: Age birth to 18 years

### Scopus (n=3303)

(TITLE-ABS ("vitamin D") OR TITLE-ABS (ergocalciferol) OR TITLE-ABS (cholecalciferol) OR TITLE-ABS ("vitamin D2") OR TITLE-ABS ("vitamin D3")) AND (TITLE-ABS ("25-hydroxyvitamin D") OR TITLE-ABS ("25-hydroxy vitamin D") OR TITLE-ABS ("hydroxyvitamin D") OR TITLE-ABS ("25-hydroxyvitamin D2") OR TITLE-ABS ("25-hydroxy vitamin D2") OR TITLE-ABS ("hydroxyvitamin D2") OR TITLE-ABS ("25-hydroxyvitamin D3") OR TITLE-ABS ("25-hydroxy vitamin D3") OR TITLE-ABS ("hydroxyvitamin D3") OR TITLE-ABS(25OHD) OR TITLE-ABS(25OHD2) OR TITLE-ABS(25OHD3) OR TITLE-ABS("25-OH-D") OR TITLE-ABS("25-OH-D2") OR TITLE-ABS("25-OH-D3") OR TITLE-ABS ("25(OH)D") OR TITLE-ABS ("25(OH)D2") OR TITLE-ABS ("25(OH)D3") OR TITLE-ABS ("25-OH-vitamin D") OR TITLE-ABS ("25-OH-vitamin D2") OR TITLE-ABS ("25-OH-vitamin D3") OR TITLE-ABS (hydroxycholecalciferol) OR TITLE-ABS (hydroxyergocalciferol) OR TITLE-ABS (calcitriol) OR TITLE-ABS (calcidiol)) AND (ALL ("clinical trial") OR ALL ("controlled trial"))

Limited by the filter in the site: exclusion Adults

### ISI Web of Science (n=320)

(TS="vitamin D" OR TS=ergocalciferol OR TS="vitamin D2" OR TS=cholecalciferol OR TS="vitamin D3") AND (TS="25-hydroxyvitamin D" OR TS="25-hydroxy vitamin D" OR TS="hydroxyvitamin D" OR TS="25-hydroxyvitamin D2" OR TS="25-hydroxy vitamin D2" OR TS="hydroxyvitamin D2" OR TS="25-hydroxyvitamin D3" OR TS="25-hydroxy vitamin D3" OR TS="hydroxyvitamin D3" OR TS=25OHD OR TS= 25OHD2 OR TS= 25OHD3 OR TS="25(OH)D" OR TS="25(OH)D2" OR TS="25(OH)D3" OR TS="25OH D" OR TS="25OH D2" OR TS="25OH D3" OR TS="25-OH-vitamin D" OR TS="25-OH-vitamin D2" OR TS="25-OH-vitamin D3" OR TS=hydroxycholecalciferol OR TS=hydroxyergocalciferol OR TS=calcitriol OR TS= calcidiol) AND (TS="clinical trial" OR TS="controlled trial") AND (TS=child\* OR TS=adolesc\*)

**Cochrane Central Register of Controlled Trials (CENTRAL) (n=552)**

("vitamin D":ti,ab,kw OR "ergocalciferol":ti,ab,kw OR "vitamin D-2":ti,ab,kw OR "vitamin D2":ti,ab,kw OR "cholecalciferol":ti,ab,kw O R"vitamin D-3":ti,ab,kw OR "vitamin D3":ti,ab,kw) AND

("25-hydroxyvitamin D":ti,ab,kw OR "25-hydroxy vitamin D":ti,ab,kw OR "hydroxyvitamin D":ti,ab,kw OR "25-hydroxyvitamin D2":ti,ab,kw OR "25-hydroxy vitamin D2":ti,ab,kw OR "25-hydroxyvitamin D3":ti,ab,kw OR "25-hydroxyvitamin D-3":ti,ab,kw OR "25-hydroxy vitamin D3":ti,ab,kw OR "hydroxyvitamin D3":ti,ab,kw OR "25OHD":ti,ab,kw OR "25OHD2":ti,ab,kw OR "25OHD3":ti,ab,kw OR "25OH D":ti,ab,kw OR "25OH D3":ti,ab,kw OR "25(OH)D":ti,ab,kw OR "25(OH)D2":ti,ab,kw OR "25(OH)D3":ti,ab,kw OR "25(OH) vitamin D":ti,ab,kw OR "25(OH) vitamin D2":ti,ab,kw OR "25(OH) vitamin D3":ti,ab,kw OR "25OH vitamin D":ti,ab,kw OR "25OH vitamin D3":ti,ab,kw OR "25-hydroxycalciferol":ti,ab,kw OR "hydroxycalciferol":ti,ab,kw OR "25-hydroxycholecalciferol":ti,ab,kw OR "hydroxycholecalciferol":ti,ab,kw OR "25-OH cholecalciferol":ti,ab,kw OR "25-hydroxy cholecalciferol":ti,ab,kw OR "hydroxyergocalciferol":ti,ab,kw OR "25- hydroxyergocalciferol":ti,ab,kw OR "calcitriol":ti,ab,kw OR "calcidiol":ti,ab,kw) AND

("Child":ti,ab,kw OR "adolescence":ti,ab,kw OR "adolescent":ti,ab,kw)

**PRISMA-P (Preferred Reporting Items for Systematic review and Meta-Analysis Protocols) 2015 checklist: recommended items to address in a systematic review protocol\***

| Section and topic                 | Item No | Checklist item                                                                                                                                                                                                                | Line/page numbers        |
|-----------------------------------|---------|-------------------------------------------------------------------------------------------------------------------------------------------------------------------------------------------------------------------------------|--------------------------|
| <b>ADMINISTRATIVE INFORMATION</b> |         |                                                                                                                                                                                                                               |                          |
| Title:                            |         |                                                                                                                                                                                                                               |                          |
| Identification                    | 1a      | Identify the report as a protocol of a systematic review                                                                                                                                                                      | Page 1                   |
| Update                            | 1b      | If the protocol is for an update of a previous systematic review, identify as such                                                                                                                                            | No                       |
| Registration                      | 2       | If registered, provide the name of the registry (such as PROSPERO) and registration number                                                                                                                                    | Page 3, line 24          |
| Authors:                          |         |                                                                                                                                                                                                                               |                          |
| Contact                           | 3a      | Provide name, institutional affiliation, e-mail address of all protocol authors; provide physical mailing address of corresponding author                                                                                     | Page 1                   |
| Contributions                     | 3b      | Describe contributions of protocol authors and identify the guarantor of the review                                                                                                                                           | Page 13, lines 217-221   |
| Amendments                        | 4       | If the protocol represents an amendment of a previously completed or published protocol, identify as such and list changes; otherwise, state plan for documenting important protocol amendments                               | No                       |
| Support:                          |         |                                                                                                                                                                                                                               |                          |
| Sources                           | 5a      | Indicate sources of financial or other support for the review                                                                                                                                                                 | Page 13, lines 222-223   |
| Sponsor                           | 5b      | Provide name for the review funder and/or sponsor                                                                                                                                                                             | No                       |
| Role of sponsor or funder         | 5c      | Describe roles of funder(s), sponsor(s), and/or institution(s), if any, in developing the protocol                                                                                                                            | No                       |
| <b>INTRODUCTION</b>               |         |                                                                                                                                                                                                                               |                          |
| Rationale                         | 6       | Describe the rationale for the review in the context of what is already known                                                                                                                                                 | Page 6, lines 52-74      |
| Objectives                        | 7       | Provide an explicit statement of the question(s) the review will address with reference to participants, interventions, comparators, and outcomes (PICO)                                                                      | Pages 6-7, lines 79-83   |
| <b>METHODS</b>                    |         |                                                                                                                                                                                                                               |                          |
| Eligibility criteria              | 8       | Specify the study characteristics (such as PICO, study design, setting, time frame) and report characteristics (such as years considered, language, publication status) to be used as criteria for eligibility for the review | Pages 7-8, lines 85-113  |
| Information sources               | 9       | Describe all intended information sources (such as electronic databases, contact with study authors, trial registers or other grey literature sources) with planned dates of coverage                                         | Page 8, lines 116-119    |
| Search strategy                   | 10      | Present draft of search strategy to be used for at least one electronic database, including planned limits, such that it could be repeated                                                                                    | Pages 8-9, lines 116-130 |
| Study records:                    |         |                                                                                                                                                                                                                               |                          |

|                                    |     |                                                                                                                                                                                                                                                  |                            |
|------------------------------------|-----|--------------------------------------------------------------------------------------------------------------------------------------------------------------------------------------------------------------------------------------------------|----------------------------|
| Data management                    | 11a | Describe the mechanism(s) that will be used to manage records and data throughout the review                                                                                                                                                     | Page 10, lines 141-150     |
| Selection process                  | 11b | State the process that will be used for selecting studies (such as two independent reviewers) through each phase of the review (that is, screening, eligibility and inclusion in meta-analysis)                                                  | Page 10, lines 141-146     |
| Data collection process            | 11c | Describe planned method of extracting data from reports (such as piloting forms, done independently, in duplicate), any processes for obtaining and confirming data from investigators                                                           | Page 10, lines 141-146     |
| Data items                         | 12  | List and define all variables for which data will be sought (such as PICO items, funding sources), any pre-planned data assumptions and simplifications                                                                                          | Pages 10-11, lines 158-162 |
| Outcomes and prioritization        | 13  | List and define all outcomes for which data will be sought, including prioritization of main and additional outcomes, with rationale                                                                                                             | Page 7, lines 89-90        |
| Risk of bias in individual studies | 14  | Describe anticipated methods for assessing risk of bias of individual studies, including whether this will be done at the outcome or study level, or both; state how this information will be used in data synthesis                             | Page 10, lines 152-156     |
| Data synthesis                     | 15a | Describe criteria under which study data will be quantitatively synthesised                                                                                                                                                                      | Pages 10-11, lines 158-176 |
|                                    | 15b | If data are appropriate for quantitative synthesis, describe planned summary measures, methods of handling data and methods of combining data from studies, including any planned exploration of consistency (such as $I^2$ , Kendall's $\tau$ ) | Pages 11-12, lines 178-184 |
|                                    | 15c | Describe any proposed additional analyses (such as sensitivity or subgroup analyses, meta-regression)                                                                                                                                            | Page 12, lines 189-203     |
|                                    | 15d | If quantitative synthesis is not appropriate, describe the type of summary planned                                                                                                                                                               | No                         |
| Meta-bias(es)                      | 16  | Specify any planned assessment of meta-bias(es) (such as publication bias across studies, selective reporting within studies)                                                                                                                    | Page 12, lines 186-188     |
| Confidence in cumulative evidence  | 17  | Describe how the strength of the body of evidence will be assessed (such as GRADE)                                                                                                                                                               | Page 10, lines 152-156     |

**\* It is strongly recommended that this checklist be read in conjunction with the PRISMA-P Explanation and Elaboration (cite when available) for important clarification on the items. Amendments to a review protocol should be tracked and dated. The copyright for PRISMA-P (including checklist) is held by the PRISMA-P Group and is distributed under a Creative Commons Attribution Licence 4.0.**

*From: Shamseer L, Moher D, Clarke M, Ghersi D, Liberati A, Petticrew M, Shekelle P, Stewart L, PRISMA-P Group. Preferred reporting items for systematic review and meta-analysis protocols (PRISMA-P) 2015: elaboration and explanation. BMJ. 2015 Jan 2;349(jan02 1):g7647.*

# BMJ Open

## Effect of vitamin D supplementation on serum 25-hydroxyvitamin D concentration in children and adolescents: A systematic review and meta-analysis protocol

|                                  |                                                                                                                                                                                                                                                                                                                                                                                                                                                                                                                                                                                                                                                                                                                                                                                                                                                                                                                                 |
|----------------------------------|---------------------------------------------------------------------------------------------------------------------------------------------------------------------------------------------------------------------------------------------------------------------------------------------------------------------------------------------------------------------------------------------------------------------------------------------------------------------------------------------------------------------------------------------------------------------------------------------------------------------------------------------------------------------------------------------------------------------------------------------------------------------------------------------------------------------------------------------------------------------------------------------------------------------------------|
| Journal:                         | <i>BMJ Open</i>                                                                                                                                                                                                                                                                                                                                                                                                                                                                                                                                                                                                                                                                                                                                                                                                                                                                                                                 |
| Manuscript ID                    | bmjopen-2018-021636.R2                                                                                                                                                                                                                                                                                                                                                                                                                                                                                                                                                                                                                                                                                                                                                                                                                                                                                                          |
| Article Type:                    | Protocol                                                                                                                                                                                                                                                                                                                                                                                                                                                                                                                                                                                                                                                                                                                                                                                                                                                                                                                        |
| Date Submitted by the Author:    | 11-Jul-2018                                                                                                                                                                                                                                                                                                                                                                                                                                                                                                                                                                                                                                                                                                                                                                                                                                                                                                                     |
| Complete List of Authors:        | Asghari, Golaleh; National Nutrition and Food Technology Research Institute, Shahid Beheshti University of Medical Sciences, Tehran, Iran, Department of Clinical Nutrition and Dietetics, Faculty of Nutrition Sciences and Food Technology<br>Farhadnejad, Hossein; National Nutrition and Food Technology Research Institute, Shahid Beheshti University of Medical Sciences, Tehran, Iran<br>Hosseinpanah, Farhad; Obesity Research Center, Research Institute for Endocrine Sciences, Shahid Beheshti University of Medical Sciences, Tehran, Iran<br>Moslehi, Nazanin; Shahid Beheshti University of Medical Sciences, Tehran, Iran<br>Mirmiran, Parvin; Nutrition and Endocrine Research Center, Research Institute for Endocrine Sciences, Shahid Beheshti University of Medical Sciences, Tehran, Iran<br>Azizi, Fereidoun; Research Institute for Endocrine Sciences, Shahid Beheshti University of Medical Sciences, |
| <b>Primary Subject Heading</b> : | Nutrition and metabolism                                                                                                                                                                                                                                                                                                                                                                                                                                                                                                                                                                                                                                                                                                                                                                                                                                                                                                        |
| Secondary Subject Heading:       | Nutrition and metabolism, Public health                                                                                                                                                                                                                                                                                                                                                                                                                                                                                                                                                                                                                                                                                                                                                                                                                                                                                         |
| Keywords:                        | Vitamin D, 25-hydroxyvitamin D, children, adolescents, meta-analysis                                                                                                                                                                                                                                                                                                                                                                                                                                                                                                                                                                                                                                                                                                                                                                                                                                                            |
|                                  |                                                                                                                                                                                                                                                                                                                                                                                                                                                                                                                                                                                                                                                                                                                                                                                                                                                                                                                                 |

SCHOLARONE™  
Manuscripts

**Effect of vitamin D supplementation on serum 25-hydroxyvitamin D concentration in children and adolescents: A systematic review and meta-analysis protocol**

Golaleh Asghari<sup>1</sup>, Hossein Farhadnejad<sup>1</sup>, Farhad Hosseinpanah<sup>3</sup>, Nazanin Moslehi<sup>1</sup>, Parvin Mirmiran<sup>2</sup>, Fereidoun Azizi<sup>4</sup>

<sup>1</sup>Department of Clinical Nutrition and Dietetics, Faculty of Nutrition Sciences and Food Technology, National Nutrition and Food Technology Research Institute, Shahid Beheshti University of Medical Sciences, Tehran, Iran

<sup>2</sup>Nutrition and Endocrine Research Center, Research Institute for Endocrine Sciences, Shahid Beheshti University of Medical Sciences, Tehran, Iran

<sup>3</sup>Obesity Research Center, Research Institute for Endocrine Sciences, Shahid Beheshti University of Medical Sciences, Tehran, Iran

<sup>4</sup>Endocrine Research Center, Research Institute for Endocrine Sciences, Shahid Beheshti University of Medical Sciences, Tehran, Iran

**Correspondence to:**

Parvin Mirmiran  
Nutrition and Endocrine Research Center, Research Institute for Endocrine Science, Shahid Beheshti University of Medical Sciences, Tehran, Iran  
P.O. Box: 19395-4763  
Phone: +98 (21) 22432503  
Fax: +98 (21) 22402463  
E-mail: [mirmiran@endocrine.ac.ir](mailto:mirmiran@endocrine.ac.ir)  
Alternative E-mail: [parvin.mirmiran@gmail.com](mailto:parvin.mirmiran@gmail.com)

## 1 Abstract

2 **Introduction:** The importance of vitamin D for bone health as well as its role in non-skeletal  
3 functions has long been documented. However, review investigations on the effect of vitamin D  
4 supplementation on serum 25-hydroxyvitamin D (25(OH)D) levels in children and adolescents  
5 are scarce. The aim of current study was to assess the impact of various doses of vitamin D  
6 supplementation on serum 25(OH)D concentrations in children and adolescents, and to identify  
7 relevant determinants of variations in the effect of vitamin D supplementation.

8 **Methods:** PubMed, Scopus, ISI Web of Science, and Cochrane Central Register of Controlled  
9 Trials (CENTRAL) databases up to the 27-Sep-2017 will systematically be searched for  
10 randomized controlled trials of vitamin D supplementation. We considered articles with the  
11 following control groups as eligible: Placebo control, control group without any  
12 supplementation, or a comparative arm investigation. Two reviewers will assess articles for  
13 eligibility according to pre-specified selection criteria, after which data extraction and quality  
14 appraisal will be conducted by 2 independent reviewers. The quality assessment will be assessed  
15 using Jadad scales. Meta-analyses will be conducted where appropriate. We will express  
16 continuous measures (i.e serum 25(OH)D concentration) as mean differences (MDs) with 95%  
17 CIs. Heterogeneity of the data will be investigated via visual inspection of the forest plots and  
18 using Chi<sup>2</sup> test on N-1 degrees of freedom, with a significance level of  $\alpha=0.1$ . We will also  
19 assess the individual study and subgroup characteristics and perform a sensitivity analysis.  
20 Publication bias will be assessed using funnel plot and statistical analysis of Eggers' test.

1  
2  
3  
4  
5  
6  
7  
8  
9  
10  
11  
12  
13  
14  
15  
16  
17  
18  
19  
20  
21  
22  
23  
24  
25  
26  
27  
28  
29  
30  
31  
32  
33  
34  
35  
36  
37  
38  
39  
40  
41  
42  
43  
44  
45  
46  
47  
48  
49  
50  
51  
52  
53  
54  
55  
56  
57  
58  
59  
60

**Ethics and dissemination:** Ethics approval is not required because the work will be carried out on published documents. The authors will publish findings from this review through peer-reviewed publication or conference presentations.

**Prospero registration number:** PROSPERO CRD42017067179.

**Keywords:** Vitamin D; 25-hydroxyvitamin D; Children; Adolescents; Supplementation; Systematic review

For peer review only

## 27 **Strengths and limitations of this study**

- 28       • This systematic review will comprehensively assess the effectiveness and safety of  
29       various doses of vitamin D supplementation in children and adolescents for improving  
30       serum 25(OH)D concentrations.
- 31       • The study screening, data extraction and quality assessment will be fulfilled by two  
32       independent reviewers.
- 33       • Based on previous reviews dealing with vitamin D, we expect considerable heterogeneity  
34       of our data, which might be due to variables, including sex, 25(OH)D baseline level,  
35       length of intervention, frequency of intervention, doses of vitamin D supplementation.
- 36       • The systematic review will include only published data.

1  
2  
3 37 **Introduction**  
4

5 38 The importance of vitamin D for bone health as well as its role in non-skeletal functions has long  
6  
7  
8 39 been clarified [1]. Currently, vitamin D deficiency is a global problem, and a recent systematic  
9  
10 40 review found that about 37% of the studies reported an average of less than 20 ng/ml for 25-  
11  
12 41 hydroxyvitamin D (25(OH)D) [2]. Since during childhood and adolescence, vitamin D  
13  
14 42 requirements increase for the growth of muscle and bone, vitamin D deficiency is often observed  
15  
16  
17 43 during this period [3]. Low vitamin D status has recently been reported in children and  
18  
19 44 adolescents across countries of the Middle East such as Iran [4, 5], Saudi Arabia [6], Jordan [7],  
20  
21 45 and United Arab Emirates [8], as well as in South East Asia [9, 10], Europe [11], and the United  
22  
23 46 States [12].  
24  
25  
26

27 47 Serum level of 25(OH)D is a commonly used marker of the long-term vitamin D nutritional  
28  
29 48 status of individuals. Exposure to sunlight is the most important factor in the synthesis of vitamin  
30  
31 49 D, which is dependent on skin color, latitude, season, lifestyle, and dress codes based on the  
32  
33 50 cultural beliefs of individuals [3]. Dietary intakes of limited foods such as fatty fish, egg yolk,  
34  
35 51 cheese, and fortified foods with vitamin D and also supplementation of vitamin D may increase  
36  
37 52 25(OH)D concentrations [13, 14]. Previous studies in adults showed that baseline 25-  
38  
39 53 hydroxyvitamin D, concurrent calcium intakes, and levels of overweight and obesity are among  
40  
41 54 other factors which may affect 25(OH)D in response to vitamin D supplementation [15].  
42  
43 55 Although many trials have evaluated the effects of vitamin D supplementation on clinical  
44  
45 56 outcomes, few attempts have been made to evaluate the effects of various doses of vitamin D  
46  
47 57 supplementation on serum 25(OH)D levels in children and adolescents [16], a factor crucial to  
48  
49 58 stipulating dietary recommendations. Based on recommendations of the Institute of Medicine  
50  
51 59 (IOM) in 2011, the recommended daily dietary allowance (RDA) is 600 IU for 9-18-year old  
52  
53  
54  
55  
56  
57  
58  
59  
60

children and adolescents [17], whereas based on recommendations of the Endocrine Society, 9-18-year old children and adolescents need at least 600 IU of vitamin D daily, and at least 1000 IU of vitamin D is essential to maintain levels of 25(OH)D > 30 ng/ml [3]; this controversy may be explained by the fact that IOM recommendations are based on achieving the target level of  $\geq 20$  ng/ml for 25-hydroxyvitamin D, while the Endocrine society recommendation is based on achieving  $\geq 30$  ng/ml. The Society for Adolescent Health and Medicine suggests 600 IU vitamin D for healthy adolescents and at least 1000 IU for those at risk of vitamin D deficiency, such as obese adolescents [18], emphasizing the differences in recommendations of these two scientific societies.

Previous studies have shown that obesity might also influence 25(OH)D, 1,25-hydroxyvitamin D, and parathyroid hormone levels [19-21]. A systematic review in adults found that the average increase in serum 25(OH)D concentrations was 0.78 ng/ml per mcg of vitamin D<sub>3</sub> per day [22]. Recently a review study from the Middle East and North Africa (MENA) region showed that intakes of an intermediate vitamin D dose of 1000–2000 IU daily may be necessary to achievement of level in 20 ng/ml 25(OH)D in children and adolescents [16].

To the best of our knowledge, to date, no systematic review has been conducted on the effect of vitamin D supplementation on serum 25(OH)D levels in children and adolescents worldwide. In previous original studies also the optimum level of 25(OH)D had not been determined [13, 23, 24], and because of lower power, the graded response to vitamin D supplementation could not be explored. This review will therefore aim at determining the effectiveness of various doses of vitamin D supplementation in children and adolescents for improving serum 25(OH)D concentrations and assessing the graded response to vitamin D supplementation. Secondly, we

1  
2  
3  
4  
5  
6  
7  
8  
9  
10  
11  
12  
13  
14  
15  
16  
17  
18  
19  
20  
21  
22  
23  
24  
25  
26  
27  
28  
29  
30  
31  
32  
33  
34  
35  
36  
37  
38  
39  
40  
41  
42  
43  
44  
45  
46  
47  
48  
49  
50  
51  
52  
53  
54  
55  
56  
57  
58  
59  
60

82 aimed to determine if the effect of vitamin D supplementation on serum 25(OH)D varies by  
83 baseline vitamin D status, sex, body mass index, puberty status, or the type of vitamin D given.

84 **Methods**

85 *Types of studies*

86 We will include randomized controlled trials of vitamin D supplementation with one of the  
87 following: Placebo, no control, or comparative arm studies. Comparative arm is an arm type in  
88 which a group of participants receives another dose of vitamin D, or fortified foods with vitamin  
89 D, or other micronutrients such as vitamin E during the clinical trial. Also, all the included  
90 studies must have reported 25(OH)D level at baseline and at the end of the study.

91 *Types of participants*

92 Healthy children and adolescents (aged  $\leq 18$  years old) given vitamin D as a preventive measure  
93 of certain diseases or individuals with mild diseases (such as flu, obesity, asthma, hypertension,  
94 and etc.) that have no reason to have altered vitamin D metabolism.

95 *Exclusion criteria:*

96 a) Rickets in children characterized by low 25(OH)D, (below 15 ng/ml) with radiologic or  
97 laboratory evidence requiring higher doses of vitamin D supplementation (higher than those  
98 recommended for the general population).

99 b) Individuals with chronic illnesses (chronic kidney disease (glomerular filtration rate at or  
100 below 30 ml/min), liver disease, heart failure (New York Heart Association class 3 or more)

101 c) Individuals with conditions or on drug therapy both of which may affect vitamin D  
102 metabolism and vitamin D binding protein /metabolism (anticonvulsants, steroids, anti-fungal,  
103 malabsorption, bypass surgery)

#### 104 *Types of intervention*

##### 105 Inclusion criteria:

106 Vitamin D (D2 or D3) supplementation of any dose, given orally, daily, weekly or monthly, with  
107 or without calcium supplementation

##### 108 Exclusion criteria:

109 a) Studies that used active vitamin D supplementation (1,25-dihydroxyvitamin D) as this type of  
110 supplementation is not recommended for the general population.

111 b) Studies that used vitamin D supplementation given intra muscularly

112 c) Studies that used vitamin D supplementation as fortified foods as the amount of vitamin  
113 cannot be defined accurately

#### 114 **Patient and public involvement**

115 Patients and/or public are not involved in this study.

116

#### 117 **Search methods for identification of studies**

##### 118 **Electronic searches**

We will perform a systematic search of published randomized trials on vitamin D supplementation in subjects aged  $\leq 18$  years in PubMed, Scopus, ISI Web of Science, and Cochrane Central Register of Controlled Trials (CENTRAL) databases up to 27-Sep-2017, using eligible keywords in titles or abstracts (for details on search strategies see Supplementary File 1), using the following search terms: [Vitamin D or ergocalciferol or cholecalciferol or calcidiol or calcitriol] and [25-hydroxyvitamin D or hydroxyvitamin D or 25OHD or 25(OH)D or 25-OH-vitamin D or hydroxycholecalciferol or 25-hydroxy vitamin D or hydroxyergocalciferol] and [clinical trial or controlled trial]. Inclusion criteria will be the  $\leq 18$  year (children and adolescents age group). The first search will be done without language restrictions using various combinations of relevant keywords. We will also perform a complete updated search on all databases available and identify new studies (if any exist) for inclusion, assess them and incorporate the findings in our review.

**Searching other resources**

To complete the data bank, we will use snowballing techniques to complement the database searches by screening the reference lists of included articles for relevant studies.

**Data collection and analysis**

**Selection of studies**

Two authors (G.A., H.F.) will independently determine studies that should be evaluated further by scanning the title, abstract, or both, of every study retrieved based on inclusion/exclusion criteria. We will assess all potentially relevant articles as full texts and resolve any disagreement through consensus or consultation with a third review author for resolving differences and reaching consensus (F.H.). Also, an adapted PRISMA (Preferred Reporting Items for Systematic

1  
2  
3 141 Reviews and Meta-Analyses) flow diagram will be presented to indicate the process of study  
4  
5 142 selection [25].  
6  
7

### 8 143 **Data extraction and management**

9  
10 144 In the first step, two authors (G.A., H.F.) will independently select articles by title and abstract or  
11  
12 145 search reference lists of relevant studies, and in the second, full texts of selected articles will be  
13  
14 146 retrieved and screened using inclusion and exclusion criteria (study design, participants, and  
15  
16 147 intervention). Finally, in the third step, we will extract the relevant data from the selected articles  
17  
18 148 in a structured data bank (G.A., H.F.). We will resolve any disagreement through consensus or  
19  
20 149 consultation with a third author for resolving differences (F.H.).  
21  
22  
23  
24

### 25 150 **Dealing with duplicate and companion publications**

26  
27  
28 151 In case of duplicate papers or multiple publications of a primary study, we will enhance yield of  
29  
30 152 information by collating all available data and use the most complete dataset aggregated across  
31  
32 153 all known publications.  
33  
34  
35

### 36 154 **Quality assessment**

37  
38  
39 155 The quality of each included study will be assessed independently by two authors (G.A., H.F.).  
40  
41 156 We will assess the quality assessment, focusing on the following criteria: Randomization,  
42  
43 157 allocation concealment, blinding of personnel and of participants, incomplete outcome data,  
44  
45 158 selective reporting and other potential sources of bias using Jadad scales [26]. We will resolve  
46  
47 159 disagreements in quality assessments by consensus, or by consultation with a third author (F.H.).  
48  
49  
50

### 51 160 **Data synthesis**

1  
2  
3  
4  
5  
6  
7  
8  
9  
10  
11  
12  
13  
14  
15  
16  
17  
18  
19  
20  
21  
22  
23  
24  
25  
26  
27  
28  
29  
30  
31  
32  
33  
34  
35  
36  
37  
38  
39  
40  
41  
42  
43  
44  
45  
46  
47  
48  
49  
50  
51  
52  
53  
54  
55  
56  
57  
58  
59  
60

We will present data of all included studies and provide a description of results, including study population, intervention, and outcome in details in both summary tables and the text. Also, a meta-analysis using fixed- or random-effects modeling will be conducted to summarize weighed mean differences and 95% CI in 25(OH)D from baseline to follow-up during the supplementation [27, 28]. We will first perform graphical exploration of variability of changes in 25(OH)D levels due to vitamin D doses. A potential nonlinear or linear dose-response relationship between vitamin D supplementation and serum 25(OH)D concentration will be modelled by using restricted cubic splines. We will fit meta-regression models for prediction of linear change in 25(OH)D concentration. We will complete statistical analyses based on the statistical guidelines contained in the latest version of the Cochrane Handbook for Systematic Reviews of Interventions [29].

If faced with any missing data in some studies in the process of analysis and data extraction and if we have proper evidence that indicats the randomness of these missing data, we will use data from existing data analyses, otherwise we will obtain the missing data from the study authors if possible; an alternate method where the value of some indices, including mean or standard deviation are not reported for outcomes is to impute these values by assuming the mean, standard deviation of the missing data to be the average of the mean or standard deviation of data from those studies where this information was given. To investigate the impact of imputation on meta-analyses, we will use sensitivity analysis.

**Assessment of heterogeneity**

Any clinical, methodological or statistical heterogeneity of the data will be investigated via visual inspection of the forest plots and using Chi<sup>2</sup> test with N-1 degrees of freedom (df), and

significance level of  $\alpha = 0.1$ . If the power of this test is low, we will also calculate heterogeneity by  $I^2$ , a transformation of the square root of the  $\text{Chi}^2$  test divided by its df [30]. If the values of  $I^2$  is high we will have greater heterogeneity [31]; should there be heterogeneity in our investigation, we will assess the individual study and subgroup characteristics and perform a sensitivity analysis to clarify the reasons of this heterogeneity [32].

### **Assessment of publication biases**

Publication bias will be assessed using funnel plot and statistical analysis of Eggers' test [33, 34]. We will only test for funnel plot asymmetry if our review includes over 10 studies that assess a specific outcome.

### **Subgroup analysis**

After the final search and screening, if a sufficient number of studies are available, we will perform subgroup analyses and investigate interactions based on the following: Characteristics of participants, intervention, and outcomes including sex, 25-hydroxy vitamin D baseline level, puberty status, season, latitude, type of vitamin D, calcium supplementation, compliance, length of intervention, frequency of intervention, doses of vitamin D supplementation, and quality of studies.

### **Sensitivity analysis**

We will carry out sensitivity analyses because of the exploring the influence of following factors on effect sizes and validity of the estimations:

1. Investigation of the impact of quality assessment on the results

1  
2  
3  
4  
5  
6  
7  
8  
9  
10  
11  
12  
13  
14  
15  
16  
17  
18  
19  
20  
21  
22  
23  
24  
25  
26  
27  
28  
29  
30  
31  
32  
33  
34  
35  
36  
37  
38  
39  
40  
41  
42  
43  
44  
45  
46  
47  
48  
49  
50  
51  
52  
53  
54  
55  
56  
57  
58  
59  
60

- 203        2. An analysis of the influence of various characteristics of studies using the following
- 204               filters: Duration of intervention, sex, language of publication, country, and dose of
- 205               administration
- 206        3. An assessment of the effect of different variance imputations.

**Ethics and dissemination:** Ethics approval is not required because the work is carried out on published documents. The authors will publish findings from this review through peer-reviewed publication or conference presentations.

**Acknowledgements:** We wish to acknowledge Ms Niloofar shiva for critical editing of English grammar and syntax of the manuscript.

**Contributors:** GA had the original idea of this work. GA, HF, and FH designed and conceived the protocol. NM designed the search strategies. PM proposed some important advice for the study design and revision and PM and FA aided in developing the research questions. All authors critically revised the draft of the manuscript and approved its final version. GA and HF are the guarantors of the review.

**Funding:** This research received no specific grant from any funding agency in the public, commercial or not-for-profit sectors.

**Competing interests:** None declared.

**Provenance and peer review:** Not commissioned; externally peer reviewed.

## References

1. Rosen CJ, Adams JS, Bikle DD, Black DM, Demay MB, Manson JE, et al. The nonskeletal effects of vitamin D: an Endocrine Society scientific statement. *Endocrine reviews*. 2012;33:456-92.
2. Hilger J, Friedel A, Herr R, Rausch T, Roos F, Wahl DA, et al. A systematic review of vitamin D status in populations worldwide. *The British journal of nutrition*. 2014;111:23-45.
3. Holick MF, Binkley NC, Bischoff-Ferrari HA, Gordon CM, Hanley DA, Heaney RP, et al. Evaluation, treatment, and prevention of vitamin D deficiency: an Endocrine Society clinical practice guideline. *The Journal of clinical endocrinology and metabolism*. 2011;96:1911-30.
4. Kelishadi R, Ardalan G, Motlagh ME, Shariatinejad K, Heshmat R, Poursafa P, et al. National report on the association of serum vitamin D with cardiometabolic risk factors in the pediatric population of the Middle East and North Africa (MENA): the CASPIAN-III Study. *Nutrition (Burbank, Los Angeles County, Calif)*. 2014;30:33-8.
5. Neyestani TR, Hajifaraji M, Omidvar N, Eshraghian MR, Shariatzadeh N, Kalayi A, et al. High prevalence of vitamin D deficiency in school-age children in Tehran, 2008: a red alert. *Public health nutrition*. 2012;15:324-30.
6. Al-Daghri NM, Al-Saleh Y, Khan N, Sabico S, Aljohani N, Alfawaz H, et al. Sun exposure, skin color and vitamin D status in Arab children and adults. *The Journal of steroid biochemistry and molecular biology*. 2016.
7. Gharaibeh MA, Stoecker BJ. Assessment of serum 25(OH)D concentration in women of childbearing age and their preschool children in Northern Jordan during summer. *European journal of clinical nutrition*. 2009;63:1320-6.
8. Muhairi SJ, Mehairi AE, Khouri AA, Naqbi MM, Maskari FA, Al Kaabi J, et al. Vitamin D deficiency among healthy adolescents in Al Ain, United Arab Emirates. *BMC public health*. 2013;13:33.
9. Smith G, Wimalawansa SJ, Laillou A, Sophonneary P, Un S, Hong R, et al. High Prevalence of Vitamin D Deficiency in Cambodian Women: A Common Deficiency in a Sunny Country. *Nutrients*. 2016;8.
10. Al-Sadat N, Majid HA, Sim PY, Su TT, Dahlui M, Abu Bakar MF, et al. Vitamin D deficiency in Malaysian adolescents aged 13 years: findings from the Malaysian Health and Adolescents Longitudinal Research Team study (MyHeARTs). *BMJ open*. 2016;6:e010689.
11. Cashman KD, Dowling KG, Skrabakova Z, Gonzalez-Gross M, Valtuena J, De Henauw S, et al. Vitamin D deficiency in Europe: pandemic? *The American journal of clinical nutrition*. 2016;103:1033-44.

12. Rovner AJ, O'Brien KO. Hypovitaminosis D among healthy children in the United States: a review of the current evidence. *Archives of pediatrics & adolescent medicine*. 2008;162:513-9.

13. Aloia JF, Patel M, Dimaano R, Li-Ng M, Talwar SA, Mikhail M, et al. Vitamin D intake to attain a desired serum 25-hydroxyvitamin D concentration. *The American journal of clinical nutrition*. 2008;87:1952-8.

14. Smith TJ, Tripkovic L, Damsgaard CT, Molgaard C, Ritz C, Wilson-Barnes SL, et al. Estimation of the dietary requirement for vitamin D in adolescents aged 14-18 y: a dose-response, double-blind, randomized placebo-controlled trial. *The American journal of clinical nutrition*. 2016;104:1301-9.

15. Zittermann A, Ernst JB, Gummert JF, Borgermann J. Vitamin D supplementation, body weight and human serum 25-hydroxyvitamin D response: a systematic review. *European journal of nutrition*. 2014;53:367-74.

16. Chakhtoura M, El Ghandour S, Shawwa K, Akl EA, Arabi A, Mahfoud Z, et al. Vitamin D replacement in children, adolescents and pregnant women in the Middle East and North Africa: A systematic review and meta-analysis of randomized controlled trials. *Metabolism*. 2017;70:160-76.

17. Ross AC, Manson JE, Abrams SA, Aloia JF, Brannon PM, Clinton SK, et al. The 2011 report on dietary reference intakes for calcium and vitamin D from the Institute of Medicine: what clinicians need to know. *The Journal of clinical endocrinology and metabolism*. 2011;96:53-8.

18. The Society for Adolescent Health and Medicine. Recommended vitamin D intake and management of low vitamin D status in adolescents: a position statement of the society for adolescent health and medicine. *The Journal of adolescent health : official publication of the Society for Adolescent Medicine*. 2013;52:801-3.

19. Parikh SJ, Edelman M, Uwaifo GI, Freedman RJ, Semega-Janneh M, Reynolds J, et al. The relationship between obesity and serum 1,25-dihydroxy vitamin D concentrations in healthy adults. *The Journal of clinical endocrinology and metabolism*. 2004;89:1196-9.

20. Lagunova Z, Porojnicu AC, Lindberg F, Hexeberg S, Moan J. The dependency of vitamin D status on body mass index, gender, age and season. *Anticancer research*. 2009;29:3713-20.

21. Shapses SA, Lee EJ, Sukumar D, Durazo-Arvizu R, Schneider SH. The effect of obesity on the relationship between serum parathyroid hormone and 25-hydroxyvitamin D in women. *The Journal of clinical endocrinology and metabolism*. 2013;98:E886-90.

22. Autier P, Gandini S, Mullie P. A systematic review: influence of vitamin D supplementation on serum 25-hydroxyvitamin D concentration. *The Journal of clinical endocrinology and metabolism*. 2012;97:2606-13.

23. Hall LM, Kimlin MG, Aronov PA, Hammock BD, Slusser JR, Woodhouse LR, et al. Vitamin D Intake Needed to Maintain Target Serum 25-Hydroxyvitamin D Concentrations in Participants with Low

Sun Exposure and Dark Skin Pigmentation Is Substantially Higher Than Current Recommendations. The Journal of nutrition. 2010;140:542-50.

24. Vieth R. Vitamin D supplementation, 25-hydroxyvitamin D concentrations, and safety. The American journal of clinical nutrition. 1999;69:842-56.

25. Liberati A, Altman DG, Tetzlaff J, Mulrow C, Gøtzsche PC, Ioannidis JPA, et al. The PRISMA Statement for Reporting Systematic Reviews and Meta-Analyses of Studies That Evaluate Health Care Interventions: Explanation and Elaboration. PLoS Medicine. 2009;6:e1000100.

26. Jadad AR, Moore RA, Carroll D, Jenkinson C, Reynolds DJ, Gavaghan DJ, et al. Assessing the quality of reports of randomized clinical trials: is blinding necessary? Controlled clinical trials. 1996;17:1-12.

27. Wood L, Egger M, Gluud LL, Schulz KF, Jüni P, Altman DG, et al. Empirical evidence of bias in treatment effect estimates in controlled trials with different interventions and outcomes: meta-epidemiological study. BMJ : British Medical Journal. 2008;336:601-5.

28. Higgins J, Thompson SG, Spiegelhalter DJ. A re-evaluation of random-effects meta-analysis. Journal of the Royal Statistical Society: Series A (Statistics in Society). 2009;172:137-59.

29. Higgins JPT, Altman DG, Sterne JAC (editors). Chapter 8: Assessing risk of bias in included studies. In: Higgins JPT, Green S (editors). Cochrane Handbook for Systematic Reviews of Interventions Version 5.1.0 (updated March 2011). The Cochrane Collaboration, 2011. Available from [www.cochrane-handbook.org](http://www.cochrane-handbook.org).

30. Higgins JP, Thompson SG. Quantifying heterogeneity in a meta-analysis. Statistics in medicine. 2002;21:1539-58.

31. Higgins JP, Green S. Cochrane handbook for systematic reviews of interventions: Wiley Online Library; 2008.

32. Baker WL, White CM, Cappelleri JC, Kluger J, Coleman CI. Understanding heterogeneity in meta-analysis: the role of meta-regression. International journal of clinical practice. 2009;63:1426-34.

33. Egger M, Davey Smith G, Schneider M, Minder C. Bias in meta-analysis detected by a simple, graphical test. Bmj. 1997;315:629-34.

34. Sterne JA, Sutton AJ, Ioannidis JP, Terrin N, Jones DR, Lau J, et al. Recommendations for examining and interpreting funnel plot asymmetry in meta-analyses of randomised controlled trials. Bmj. 2011;343:d4002.

1  
2  
3  
4  
5  
6  
7  
8  
9  
10  
11  
12  
13  
14  
15  
16  
17  
18  
19  
20  
21  
22  
23  
24  
25  
26  
27  
28  
29  
30  
31  
32  
33  
34  
35  
36  
37  
38  
39  
40  
41  
42  
43  
44  
45  
46  
47

**PRISMA-P (Preferred Reporting Items for Systematic review and Meta-Analysis Protocols) 2015 checklist: recommended items to address in a systematic review protocol\***

| Section and topic                 | Item No | Checklist item                                                                                                                                                                                                                | Line/page numbers        |
|-----------------------------------|---------|-------------------------------------------------------------------------------------------------------------------------------------------------------------------------------------------------------------------------------|--------------------------|
| <b>ADMINISTRATIVE INFORMATION</b> |         |                                                                                                                                                                                                                               |                          |
| Title:                            |         |                                                                                                                                                                                                                               |                          |
| Identification                    | 1a      | Identify the report as a protocol of a systematic review                                                                                                                                                                      | Page 1                   |
| Update                            | 1b      | If the protocol is for an update of a previous systematic review, identify as such                                                                                                                                            | No                       |
| Registration                      | 2       | If registered, provide the name of the registry (such as PROSPERO) and registration number                                                                                                                                    | Page 3, line 24          |
| Authors:                          |         |                                                                                                                                                                                                                               |                          |
| Contact                           | 3a      | Provide name, institutional affiliation, e-mail address of all protocol authors; provide physical mailing address of corresponding author                                                                                     | Page 1                   |
| Contributions                     | 3b      | Describe contributions of protocol authors and identify the guarantor of the review                                                                                                                                           | Page 13, lines 217-221   |
| Amendments                        | 4       | If the protocol represents an amendment of a previously completed or published protocol, identify as such and list changes; otherwise, state plan for documenting important protocol amendments                               | No                       |
| Support:                          |         |                                                                                                                                                                                                                               |                          |
| Sources                           | 5a      | Indicate sources of financial or other support for the review                                                                                                                                                                 | Page 13, lines 222-223   |
| Sponsor                           | 5b      | Provide name for the review funder and/or sponsor                                                                                                                                                                             | No                       |
| Role of sponsor or funder         | 5c      | Describe roles of funder(s), sponsor(s), and/or institution(s), if any, in developing the protocol                                                                                                                            | No                       |
| <b>INTRODUCTION</b>               |         |                                                                                                                                                                                                                               |                          |
| Rationale                         | 6       | Describe the rationale for the review in the context of what is already known                                                                                                                                                 | Page 6, lines 52-74      |
| Objectives                        | 7       | Provide an explicit statement of the question(s) the review will address with reference to participants, interventions, comparators, and outcomes (PICO)                                                                      | Pages 6-7, lines 79-83   |
| <b>METHODS</b>                    |         |                                                                                                                                                                                                                               |                          |
| Eligibility criteria              | 8       | Specify the study characteristics (such as PICO, study design, setting, time frame) and report characteristics (such as years considered, language, publication status) to be used as criteria for eligibility for the review | Pages 7-8, lines 85-113  |
| Information sources               | 9       | Describe all intended information sources (such as electronic databases, contact with study authors, trial registers or other grey literature sources) with planned dates of coverage                                         | Page 8, lines 116-119    |
| Search strategy                   | 10      | Present draft of search strategy to be used for at least one electronic database, including planned limits, such that it could be repeated                                                                                    | Pages 8-9, lines 116-130 |
| Study records:                    |         |                                                                                                                                                                                                                               |                          |

|                                    |     |                                                                                                                                                                                                                                                  |                            |
|------------------------------------|-----|--------------------------------------------------------------------------------------------------------------------------------------------------------------------------------------------------------------------------------------------------|----------------------------|
| Data management                    | 11a | Describe the mechanism(s) that will be used to manage records and data throughout the review                                                                                                                                                     | Page 10, lines 141-150     |
| Selection process                  | 11b | State the process that will be used for selecting studies (such as two independent reviewers) through each phase of the review (that is, screening, eligibility and inclusion in meta-analysis)                                                  | Page 10, lines 141-146     |
| Data collection process            | 11c | Describe planned method of extracting data from reports (such as piloting forms, done independently, in duplicate), any processes for obtaining and confirming data from investigators                                                           | Page 10, lines 141-146     |
| Data items                         | 12  | List and define all variables for which data will be sought (such as PICO items, funding sources), any pre-planned data assumptions and simplifications                                                                                          | Pages 10-11, lines 158-162 |
| Outcomes and prioritization        | 13  | List and define all outcomes for which data will be sought, including prioritization of main and additional outcomes, with rationale                                                                                                             | Page 7, lines 89-90        |
| Risk of bias in individual studies | 14  | Describe anticipated methods for assessing risk of bias of individual studies, including whether this will be done at the outcome or study level, or both; state how this information will be used in data synthesis                             | Page 10, lines 152-156     |
| Data synthesis                     | 15a | Describe criteria under which study data will be quantitatively synthesised                                                                                                                                                                      | Pages 10-11, lines 158-176 |
|                                    | 15b | If data are appropriate for quantitative synthesis, describe planned summary measures, methods of handling data and methods of combining data from studies, including any planned exploration of consistency (such as $I^2$ , Kendall's $\tau$ ) | Pages 11-12, lines 178-184 |
|                                    | 15c | Describe any proposed additional analyses (such as sensitivity or subgroup analyses, meta-regression)                                                                                                                                            | Page 12, lines 189-203     |
|                                    | 15d | If quantitative synthesis is not appropriate, describe the type of summary planned                                                                                                                                                               | No                         |
| Meta-bias(es)                      | 16  | Specify any planned assessment of meta-bias(es) (such as publication bias across studies, selective reporting within studies)                                                                                                                    | Page 12, lines 186-188     |
| Confidence in cumulative evidence  | 17  | Describe how the strength of the body of evidence will be assessed (such as GRADE)                                                                                                                                                               | Page 10, lines 152-156     |

**\* It is strongly recommended that this checklist be read in conjunction with the PRISMA-P Explanation and Elaboration (cite when available) for important clarification on the items. Amendments to a review protocol should be tracked and dated. The copyright for PRISMA-P (including checklist) is held by the PRISMA-P Group and is distributed under a Creative Commons Attribution Licence 4.0.**

*From: Shamseer L, Moher D, Clarke M, Ghersi D, Liberati A, Petticrew M, Shekelle P, Stewart L, PRISMA-P Group. Preferred reporting items for systematic review and meta-analysis protocols (PRISMA-P) 2015: elaboration and explanation. BMJ. 2015 Jan 2;349(jan02 1):g7647.*
