# Supplementary material for: Effect of vitamin D supplementation on serum 25-hydroxyvitamin D concentration in children and adolescents: a systematic review and meta-analysis protocol
Source: PubMed Central journal article supplement — BMJ Open. 2018 Sep 19;8(9):e021636. doi: 10.1136/bmjopen-2018-021636 (PMC6150138; doi:10.1136/bmjopen-2018-021636), 2018-09-19
Supplement: bmjopen-2018-021636supp001.pdf [file bmjopen-2018-021636supp001.pdf]

## Last Updated September 27, 2017 (n=4019)

### PubMed (n=549)

(vitamin D[tiab] OR ergocalciferol[tiab] OR vitamin D2[tiab] OR cholecalciferol[tiab] OR vitamin D3[tiab] OR "ergocalciferols"[MeSH Terms] OR "cholecalciferol"[MeSH Terms]) AND (("clinical trial"[Publication Type] OR "clinical trials as topic"[MeSH Terms] OR "clinical trial"[All Fields]) OR controlled trial[all fields] OR ("clinical trial"[Publication Type] OR "clinical trials as topic"[MeSH Terms] OR "intervention study"[All Fields])) AND ("25-hydroxyvitamin D"[tiab] OR "25-hydroxy vitamin D"[tiab] OR hydroxyvitamin D[tiab] OR "25-hydroxyvitamin D2"[tiab] OR "25-hydroxy vitamin D2"[tiab] OR "hydroxyvitamin D2"[tiab] OR "25-hydroxyvitamin D3"[tiab] OR "25-hydroxy vitamin D3"[tiab] OR "hydroxyvitamin D3"[tiab] OR "25OHD"[tiab] OR "25OHD2"[tiab] OR "25OHD3"[tiab] OR "25OH D"[tiab] OR "25OH D3"[tiab] OR "25(OH)D"[tiab] OR "25(OH)D2"[tiab] OR "25(OH)D3"[tiab] OR "25(OH) vitamin D"[tiab] OR "25(OH) vitamin D2"[tiab] OR "25(OH) vitamin D3"[tiab] OR "25OH vitamin D"[tiab] OR "25OH vitamin D3"[tiab] OR 25-hydroxycalciferol[tiab] OR hydroxycholecalciferol[tiab] OR "25-hydroxycholecalciferol"[tiab] OR "25-OH cholecalciferol"[tiab] OR "25OH cholecalciferol"[tiab] OR "25-hydroxy cholecalciferol"[tiab] OR hydroxyergocalciferol[tiab] OR "25- hydroxyergocalciferol"[tiab] OR "25-hydroxy ergocalciferol"[tiab] OR calcitriol[tiab] OR calcidiol[tiab])

Limited by filter in the site to: Age birth to 18 years

### Scopus (n=3303)

(TITLE-ABS ("vitamin D") OR TITLE-ABS (ergocalciferol) OR TITLE-ABS (cholecalciferol) OR TITLE-ABS ("vitamin D2") OR TITLE-ABS ("vitamin D3")) AND (TITLE-ABS ("25-hydroxyvitamin D") OR TITLE-ABS ("25-hydroxy vitamin D") OR TITLE-ABS ("hydroxyvitamin D") OR TITLE-ABS ("25-hydroxyvitamin D2") OR TITLE-ABS ("25-hydroxy vitamin D2") OR TITLE-ABS ("hydroxyvitamin D2") OR TITLE-ABS ("25-hydroxyvitamin D3") OR TITLE-ABS ("25-hydroxy vitamin D3") OR TITLE-ABS ("hydroxyvitamin D3") OR TITLE-ABS(25OHD) OR TITLE-ABS(25OHD2) OR TITLE-ABS(25OHD3) OR TITLE-ABS("25-OH-D") OR TITLE-ABS("25-OH-D2") OR TITLE-ABS("25-OH-D3") OR TITLE-ABS ("25(OH)D") OR TITLE-ABS ("25(OH)D2") OR TITLE-ABS ("25(OH)D3") OR TITLE-ABS ("25-OH-vitamin D") OR TITLE-ABS ("25-OH-vitamin D2") OR TITLE-ABS ("25-OH-vitamin D3") OR TITLE-ABS (hydroxycholecalciferol) OR TITLE-ABS (hydroxyergocalciferol) OR TITLE-ABS (calcitriol) OR TITLE-ABS (calcidiol)) AND (ALL ("clinical trial") OR ALL ("controlled trial"))

Limited by the filter in the site: exclusion Adults

### ISI Web of Science (n=320)

(TS="vitamin D" OR TS=ergocalciferol OR TS="vitamin D2" OR TS=cholecalciferol OR TS="vitamin D3") AND (TS="25-hydroxyvitamin D" OR TS="25-hydroxy vitamin D" OR TS="hydroxyvitamin D" OR TS="25-hydroxyvitamin D2" OR TS="25-hydroxy vitamin D2" OR TS="hydroxyvitamin D2" OR TS="25-hydroxyvitamin D3" OR TS="25-hydroxy vitamin D3" OR TS="hydroxyvitamin D3" OR TS=25OHD OR TS= 25OHD2 OR TS= 25OHD3 OR TS="25(OH)D" OR TS="25(OH)D2" OR TS="25(OH)D3" OR TS="25OH D" OR TS="25OH D2" OR TS="25OH D3" OR TS="25-OH-vitamin D" OR TS="25-OH-vitamin D2" OR TS="25-OH-vitamin D3" OR TS=hydroxycholecalciferol OR TS=hydroxyergocalciferol OR TS=calcitriol OR TS= calcidiol) AND (TS="clinical trial" OR TS="controlled trial") AND (TS=child\* OR TS=adolesc\*)

### **Cochrane Central Register of Controlled Trials (CENTRAL) (n=552)**

("vitamin D":ti,ab,kw OR "ergocalciferol":ti,ab,kw OR "vitamin D-2":ti,ab,kw OR "vitamin D2":ti,ab,kw OR "cholecalciferol":ti,ab,kw OR "vitamin D-3":ti,ab,kw OR "vitamin D3":ti,ab,kw) AND

("25-hydroxyvitamin D":ti,ab,kw OR "25-hydroxy vitamin D":ti,ab,kw OR "hydroxyvitamin D":ti,ab,kw OR "25-hydroxyvitamin D2":ti,ab,kw OR "25-hydroxy vitamin D2":ti,ab,kw OR "25-hydroxyvitamin D3":ti,ab,kw OR "25-hydroxyvitamin D-3":ti,ab,kw OR "25-hydroxy vitamin D3":ti,ab,kw OR "hydroxyvitamin D3":ti,ab,kw OR "25OHD":ti,ab,kw OR "25OHD2":ti,ab,kw OR "25OHD3":ti,ab,kw OR "25OH D":ti,ab,kw OR "25OH D3":ti,ab,kw OR "25(OH)D":ti,ab,kw OR "25(OH)D2":ti,ab,kw OR "25(OH)D3":ti,ab,kw OR "25(OH) vitamin D":ti,ab,kw OR "25(OH) vitamin D2":ti,ab,kw OR "25(OH) vitamin D3":ti,ab,kw OR "25OH vitamin D":ti,ab,kw OR "25OH vitamin D3":ti,ab,kw OR "25-hydroxycalciferol":ti,ab,kw OR "hydroxycalciferol":ti,ab,kw OR "25-hydroxycholecalciferol":ti,ab,kw OR "hydroxycholecalciferol":ti,ab,kw OR "25-OH cholecalciferol":ti,ab,kw OR "25-hydroxy cholecalciferol":ti,ab,kw OR "hydroxyergocalciferol":ti,ab,kw OR "25- hydroxyergocalciferol":ti,ab,kw OR "calcitriol":ti,ab,kw OR "calcidiol":ti,ab,kw) AND

("Child":ti,ab,kw OR "adolescence":ti,ab,kw OR "adolescent":ti,ab,kw)
